# Supplementary material for: Source apportionment of atmospheric water over East Asia – a source tracer study in CAM5.1
Source: Copernicus journal article supplement (doi:10.5194/gmd-2016-255), 2016-09-30
Supplement: Supplementary file [file gmd-2016-255-AC1-supplement.zip]

# **1 Source apportionment of atmospheric water over East Asia – a**

## **2 source tracer study in CAM5.1**

3 Chen Pan<sup>1</sup>, Bin Zhu<sup>1</sup>, Jinhui Gao<sup>1</sup>, Hanqing Kang<sup>1</sup>

4 <sup>1</sup>Key Laboratory of Meteorological Disaster, Ministry of Education (KLME), Joint International Research Laboratory of  
5 Climate and Environment Change (ILCEC), Collaborative Innovation Center on Forecast and Evaluation of Meteorological  
6 Disasters, Key Laboratory for Aerosol-Cloud-Precipitation of China Meteorological Administration, Nanjing University of  
7 Information Science & Technology, Nanjing, 210044, China

8 *Correspondence to:* Bin Zhu (binzhu@nuist.edu.cn)

## 9 Abstract

10 The atmospheric water tracer (AWT) method is implemented in the Community Atmosphere Model version 5.1 (CAM5.1)  
11 to quantitatively identify the contributions of various source regions to precipitation and water vapour over East Asia.  
12 Compared to other source apportionment methods, the AWT method was developed based on detailed physical  
13 parameterizations, and can therefore trace the behaviour of atmospheric water substances directly and exactly. According to  
14 the simulation, the north Indian Ocean (NIO) is the dominant oceanic moisture source region for precipitation over the  
15 Yangtze River Valley (YRV) and South China (SCN) in summer, while the Northwest Pacific (NWP) dominates during  
16 other seasons. Evaporation over the South China Sea (SCS) is responsible for only ~~2.87~~4.23.7% of summer precipitation  
17 over the YRV and SCN. In addition, the Indo-China Peninsula is an important terrestrial moisture source region (annual  
18 contribution of ~10%). The overall relative contribution of each source region to the water vapour amount is similar to the  
19 corresponding contribution to precipitation over the YRV and SCN. A case study for the SCS shows that only a small part  
20 (~~≤5.85~~5%) of water vapour originates from local evaporation, while much more water vapour is supplied by the NWP and  
21 NIO. In addition, because evaporation from the SCS represents only a small contribution to the water vapour over the YRV  
22 and SCN in summer, the SCS mainly acts as a water vapour transport pathway where moisture from the NIO and NWP meet.

23

## 24 Keywords

25 Atmospheric water tracer method; Community Atmosphere Model; source apportionment; precipitation and water vapour

## 26 1 Introduction

27 Water vapour is one of the most important components of the atmosphere, affecting global climate and weather patterns  
28 (Held and Soden, 2000). Among current studies of the hydrological cycle, the identification of moisture sources to the  
29 atmosphere is an important topic, because a better understanding of these sources will benefit long-term forecasting, disaster  
30 prevention, and allocation of water resources (Bosilovich and Schubert, 2002).

31  
32 Source apportionment methods have been developed to identify atmospheric moisture source regions. These methods  
33 generally can be divided into three types, namely analytical models, isotopes, and numerical (Lagrangian and Eulerian)  
34 atmospheric water tracers (AWTs) (Gimeno et al., 2012). In addition, sensitivity experiments in numerical simulations such  
35 as shutting down water vapour flux at the lateral boundaries or surface evaporation (Chow et al., 2008) are an approach to  
36 study the contributions of moisture from diverse regions. Analytical models, widely used in earlier studies (Brubaker et al.,  
37 1993; Burde and Zangvil, 2001; Eltahir and Bras, 1996; Savenije, 1995; Trenberth, 1999), are generally based on various  
38 simplifying assumptions such as a well-mixed atmosphere. The stable isotopes of water, HDO and H<sub>2</sub><sup>18</sup>O, can be used to  
39 investigate the water cycle. However, water isotope data reflect a series of processes that occur simultaneously, which makes  
40 it difficult to interpret isotope results for the water cycle (Numaguti, 1999; Sodemann and Zubler, 2010). The Lagrangian  
41 method has become a popular way to analyse the transport of moisture and moisture sources of precipitation (Dirmeyer and  
42 Brubaker, 1999; Gustafsson et al., 2010; Sodemann et al., 2008; Stohl and James, 2004; Stohl et al., 2008). However,  
43 Gimeno et al. (2012) pointed out that the treatments of water vapour transport and changes of atmospheric water vapour in  
44 the Lagrangian method are not based on detailed physical equations. Sodemann and Zubler (2010) pointed out that a strong  
45 bias exists in Lagrangian precipitation estimates, because all cloud processes are neglected. Sensitivity experiments generally  
46 contain nonlinearities, which may lead to changes in the dynamic and thermodynamic structures of meteorological fields,  
47 suggesting that their results cannot be used to directly diagnose moisture sources. In contrast, the Eulerian AWT method has  
48 been developed based on detailed physical parameterizations in atmospheric models, enabling a direct and exact tracking of  
49 the behaviour of atmospheric water substances (Numaguti, 1999; Bosilovich, 2002).

51 The Eulerian AWT method was firstly developed by Joussaume et al. (1986) and Koster et al. (1986) for global circulation  
 52 models (GCMs). Later, this AWT method was applied to diagnose regional water sources in GCMs. For example, Numaguti  
 53 (1999) identified the moisture sources of Eurasian precipitation, and Bosilovich and Schubert (2002) diagnosed the moisture  
 54 sources of precipitation over North America and India. Bosilovich et al. (2003) studied water sources of the large-scale  
 55 North American monsoon, Bosilovich (2002) investigated the vertical distribution of water vapour tracers over North  
 56 America, and Sodemann et al. (2009) used this method to study sources of water vapour leading to a flood event in Central  
 57 Europe using a mesoscale model. Finally, Knoche and Kunstmann (2013) incorporated the AWT method into a fifth-  
 58 generation mesoscale model to study the transport of atmospheric moisture in West Africa.

60 In summer, the Asian summer monsoon (ASM) brings large amounts of water vapour to the East Asian (EA) continent,  
 61 leading to a wet season and abundant precipitation. Simmonds et al. (1999) pointed out that the dominant moisture transport  
 62 pathways during summer can be divided into three branches, namely (i) southwesterly flow associated with the Indian  
 63 summer monsoon, (ii) southerly or southeasterly flow associated with the southeastern Asian monsoon, and (iii) the mid-  
 64 latitude Westerlies. Correspondingly, these pathways transport moisture from (i) the Bay of Bengal (BOB) and the Arabian  
 65 Sea (AS), (ii) the South China Sea (SCS) and the Northwest Pacific (NWP), and (iii) the mid-latitude regions. Simmonds et  
 66 al. (1999) and Xu et al. (2008) pointed out that the BOB to SCS are the main source regions for rainfall over southeast China.  
 67 Using the Lagrangian Flexible Particle (FLEXPART) dispersion model (Stohl and James, 2004), Drumond et al. (2011)  
 68 discovered that the inland regions of China receive moisture mostly from western Asia, while the East China Sea (ECS) and  
 69 SCS are the main source regions for rainfall in China's eastern and southeastern coastal areas and the AS and BOB are the  
 70 main source regions for southern and central China from April to September. With the FLEXPART model, Baker et al.  
 71 (2015) demonstrated that the Indian Ocean is the primary source of moisture for East Asian summer monsoon (EASM)  
 72 rainfall. Using the same model, Chen et al. (2013) suggested that the ECS, the SCS, the Indian peninsula and BOB, and the  
 73 AS were the four major moisture source regions for summer water vapour over the Yangtze River Valley (YRV) during  
 74 2004–2009. Chow et al. (2008) suggested that water vapour supplied by the Indian summer monsoon contributed about 50%

75 to early summer precipitation over China in 1998, and inferred that the SCS may act as a pathway for water vapour transport  
76 affected by the Indian and Southeast Asian summer monsoon. However, recently Wei et al. (2012), using a Lagrangian  
77 model, showed that the major moisture transport pathways to the YRV are over land and not over the ocean. Therefore, the  
78 dominant source regions of moisture for summer rainfall over EA are still uncertain.

79

80 Baker et al. (2015) pointed out that the water vapour transport mechanisms for precipitation over China during the ASM are  
81 still unquantified. Previous studies have pointed out that analytical models need simplifying assumptions, isotope data ~~not~~  
82 ~~only~~ reflects more than just the water cycle, the Lagrangian methods lack cloud processes, and ~~that~~ sensitivity experiments  
83 contain nonlinearities, limiting diagnostic studies of moisture sources. On the other hand, the Eulerian AWT method does  
84 not have these shortcomings and is an accurate way to quantitatively determine water sources (Bosilovich, 2002). Therefore,  
85 in this study, we aim at incorporating an Eulerian AWT approach into an advanced global atmosphere model – the  
86 Community Atmosphere Model version 5.1 (CAM5.1) (Neale et al., 2012). Using this method, we address the following  
87 questions: (1) What moisture source regions are most important for precipitation and water vapour amount over EA,  
88 including the YRV and South China (SCN)? (2) What is the role of the SCS for precipitation and water vapour amount over  
89 EA during the EASM: a dominant source region or just a pathway for water vapour transport from other source regions?

90

91 In this study, detailed descriptions of physical parameterization schemes and means of implementing the AWT mechanisms  
92 in CAM5.1 are given in Sect. 2. Simulation results, including evaluation and discussion, are presented in Sect. 3. Finally,  
93 summary and concluding remarks are presented in Sect. 4.

94

## 95 **2 Model and methods**

96 The CAM5.1, released by the U.S. National Center for Atmospheric Research, is the atmospheric component of the  
97 Community Earth System Model (CESM) (Neale et al., 2012). Compared to CAM4, CAM5.1 contains a range of  
98 improvements in the representation of physical processes such as moist turbulence, shallow convection, stratiform

microphysics, cloud macrophysics schemes, and others (Neale et al., 2012). The horizontal resolution used in this study is 1.9 °in latitude and 2.5 °in longitude. The vertical range is from the surface to approximately 4 hPa ( $\approx 40$  km).

In this study, the chemistry mechanism of CAM5.1 is taken from MOZART-4 (Emmons et al., 2010), in which water vapour is invariant, which means that it is unnecessary to consider changes in water vapour during chemical processes. The basic simulations setup, including emissions and upper and lower boundary conditions, is identical to that of the specified dynamics simulations of CAM5 in Lamarque et al. (2012). In this study, the wet removal scheme is taken from Horowitz et al. (2003) is adopted. The temporal evolution of the mass mixing ratios (MMRs) of different water substances (water vapour, cloud droplets, and ice) is determined by deep convection, shallow convection, cloud macrophysics, cloud microphysics, advection, and vertical diffusion. To diagnose the dominant moisture source regions of atmospheric water over EA, the global surface is divided into 25 source regions as shown in Fig. 1. Most regions are defined based on the locations of continents and oceans. Due to the focus on moisture sources over EA in this study, EA and its adjacent regions are further divided to provide more detail. Within source region  $k$ , the surface flux of the tagged water vapour tracer  $E^k$  is equal to the surface evaporation flux of water vapour  $E$ ; otherwise  $E^k = 0$ . As in the treatment described in Knoche and Kunstmann (2013) and Bosilovich and Schubert (2002), water is “tagged” when it evaporates at its source region and is no longer tagged when it precipitates from the atmosphere to the Earth’s surface via atmospheric processes. When previously tagged precipitation reevaporates from the surface, it is regarded as newly tagged water (Knoche and Kunstmann, 2013), which then belongs to the region from where it reevaporates.

The MMRs of water vapour, cloud droplets, and ice at a particular level are defined as  $q_v$ ,  $q_l$ , and  $q_i$ , respectively. The corresponding MMRs of tagged water substances from source region  $k$  are  $q_{v,tg}^k$ ,  $q_{l,tg}^k$ , and  $q_{i,tg}^k$ . We assume that all the tagged water substances from the source regions have the identical physical properties and are well-mixed. All these tagged water substances are passive, which means that they are entirely separate from the original water substances in CAM5.1 and have no impact on dynamical and thermal fields. Numaguti (1999) suggested that the lifetime of atmospheric water vapour is about 10 days. In this study, the simulation is started in 01 January 1997, and the initial MMRs of tagged substances are set

124 to zero. To attain stable initial concentrations of tagged water substances, the simulation experiment takes a year to spin up.  
 125 We then investigate the ten-year averaged results for 1998 to 2007. -In the following, we describe the treatment of tagged  
 126 AWTs in CAM5.1's physical parameterizations.

127

## 128 2.1 Deep convection

129 In CAM5.1, deep convection is parameterized using the approach described in Zhang and McFarlane (1995), but with  
 130 modifications following Richter and Rasch (2008) and Raymond and Blyth (1986, 1992). For the temporal evolution of  $q_{v,tg}^k$ ,  
 131 it is calculated in the same way as that of  $q_v$ , but the relevant variables of tagged water vapour are substituted for the  
 132 corresponding variables of original water vapour.In the calculation of consistent transport of deep convection, we assume the  
 133 ratio of tagged and original water vapour tendencies, respectively denoted as  $\left(\frac{\partial q_{v,tg}^k}{\partial t}\right)_{dp}$  and  $\left(\frac{\partial q_v}{\partial t}\right)_{dp}$ , is equal to the ratio of  
 134 the relevant tagged water vapour MMR and the corresponding sum, expressed as:

$$135 \left(\frac{\partial q_{v,tg}^k}{\partial t}\right)_{dp} = \frac{q_{v,tg}^k}{\sum_{k=1}^n q_{v,tg}^k} \times \left(\frac{\partial q_v}{\partial t}\right)_{dp} \quad (1)$$

$$136 \left(\frac{\partial q_{v,tg}^k}{\partial t}\right)_{dp} = \epsilon_{tg}^k - c_{tg}^k - \frac{1}{\rho} \frac{\partial}{\partial z} (M_{u,dp} q_{v,u,tg}^k + M_{d,dp} q_{v,d,tg}^k - M_{c,dp} q_{v,tg}^k) \quad (1)$$

137 where  $M_{c,dp}$  is the net vertical mass flux,  $M_{u,dp}$  is the upward mass flux, and  $M_{d,dp}$  is the downward mass flux in the deep  
 138 convection.  $\epsilon_{tg}^k$  and  $c_{tg}^k$  are the large-scale mean evaporation and condensation rates of tagged water vapour, respectively.  
 139 Here,  $q_{v,u,tg}^k$  and  $q_{v,d,tg}^k$  are the MMR of tagged water vapour in the updraft and that in the downdraft, respectively. The ratio  
 140 between the MMR of tagged water vapour and the corresponding sum is used to calculate the condensation rate  $c_{tg}^k$ :

$$141 c_{tg}^k = \left(\frac{q_{v,tg}^k}{\sum_{k=1}^n q_{v,tg}^k}\right) c \quad (2)$$

142 where  $c$  is the condensation of original water vapour. In this study,  $n=25$ , which is the total number of defined source regions  
 143 (Fig. 1). In this scheme, the tagged cloud water in the updraft, the detrainment of tagged cloud water, rain production rate,  
 144 and the evaporation rate of tagged rain in the downdraft are calculated in the same ~~ways~~manner as that for the corresponding

quantities for original water. ~~but~~ However, the relevant variables of tagged water vapour are substituted for the corresponding variables of original water vapour. ~~The detailed formulas for the~~ Detailed formulas for the relevant quantities for original water in the updraft and downdraft are ~~described~~ presented in the Sect. 3 of Zhang and McFarlane (1995). ~~the assumed ratio relationship in Eq. (1) is also used to calculate the production of tagged cloud water in updraft, as well as the tagged rain production rate and evaporation rate of tagged rain in downdraft.~~ The evaporation of convection precipitation is also considered in this parameterization.

The evaporation rate  $\left(\frac{\partial q_v^k}{\partial t}\right)_{\text{dp\_evap}}$  at level  $m$  is associated with the deep convection precipitation flux  $(Q_m)_{\text{dp}}$  at the top interface of this level (Sundqvist, 1998), expressed as

$$\left(\frac{\partial q_v^k}{\partial t}\right)_{\text{dp\_evap}} = k_e (1 - \text{RH}_m) \sqrt{(Q_m)_{\text{dp}}} \quad (3)$$

where  $\text{RH}_m$  is the relative humidity at level  $m$  and the coefficient  $k_e = 2 \times 10^{-6} (\text{kg m}^{-2} \text{s}^{-1})^{-1/2} \text{s}^{-1}$ . ~~We assume that~~ The individual evaporation rate of tagged convection precipitation from source region  $k$  is calculated as:

$$\left(\frac{\partial q_{v,tg}^k}{\partial t}\right)_{\text{dp\_evap}} = \begin{cases} k_e (1 - \text{RH}_m) \frac{(Q_{m,tg}^k)_{\text{dp}}}{\sqrt{\sum_{k=1}^n (Q_{m,tg}^k)_{\text{dp}}}}, & \text{if } \sum_{k=1}^n (Q_{m,tg}^k)_{\text{dp}} \neq 0, \\ 0, & \text{if } \sum_{k=1}^n (Q_{m,tg}^k)_{\text{dp}} = 0 \end{cases} \quad (4)$$

In general, the evaporation rate of convection precipitation is very small compared to the tendency of water vapour in the deep convection (Neale et al., 2012). ~~Because the evaporation rate is associated with the deep convection precipitation flux  $Q_{\text{dp}}$ , we use the ratio of the tagged deep convection precipitation flux  $Q_{\text{dp,tg}}^k$  and the corresponding sum to calculate the evaporation of tagged deep convection precipitation:~~

$$\left(\frac{\partial q_{v,tg}^k}{\partial t}\right)_{\text{dp\_evap}} = \frac{Q_{\text{dp,tg}}^k}{\sum_{k=1}^n Q_{\text{dp,tg}}^k} \times \left(\frac{\partial q_v}{\partial t}\right)_{\text{dp\_evap}} \quad (2)$$

For the temporal evolution of  $q_{l,tg}^k$  and  $q_{i,tg}^k$  in the deep convection parameterization, both are treated in the same subroutine as  $q_l$  and  $q_i$ .



## 165 2.2 Shallow convection

166 The shallow convection scheme in CAM5.1 is taken from Park and Bretherton (2009). LikeSimilar to the MMR of the total  
 167 water  $q_t$ , the MMR of the tagged total water  $q_{t,tg}^k$  is also assumed to be a conserved quantity in non-precipitating moist  
 168 adiabatic processes. In this scheme, the diagnostic equations for the shallow convective mass flux  $M_{u,sh}$  and the MMR of the  
 169 updraft total water  $q_{t,u}$  (Bretherton et al., 2004) are expressed as:

$$170 \frac{\partial M_{u,sh}}{\partial z} = E_{tr} - D_{tr} \quad (5)$$

171 and

$$172 \frac{\partial}{\partial z} (q_{t,u} M_{u,sh}) = E_{tr} \bar{q}_t - D_{tr} q_{t,u} + \left( \frac{\partial q_t}{\partial z} \right) M_{u,sh} \quad (6)$$

173 where  $E_{tr}$  is the entrainment rate,  $D_{tr}$  is the detrainment rate, and  $\bar{q}_t$  is the MMR of the mean environmental total water. The  
 174 fractional entrainment and detrainment rates are denoted as  $\varepsilon$  and  $\delta$ , then

$$175 E_{tr} = \varepsilon M_{u,sh}, D_{tr} = \delta M_{u,sh} \quad (7)$$

176 Finally, attaining the updraft dilution equations:

$$177 \frac{\partial M_{u,sh}}{\partial z} = M_{u,sh} (\varepsilon - \delta) \quad (8)$$

$$178 \frac{\partial q_{t,u}}{\partial z} = \varepsilon (\bar{q}_t - q_{t,u}) + \frac{\partial q_t}{\partial z} \quad (9)$$

179 Similarly, the updraft dilution equation for the tagged total water is expressed as:

$$180 \frac{\partial q_{t,u,tg}^k}{\partial z} = \varepsilon (\bar{q}_{t,tg}^k - q_{t,u,tg}^k) + \frac{\partial q_{t,tg}^k}{\partial z} \quad (10)$$

181 ~~The Eq. Equation~~ (A5) of Bretherton et al. (2004) is used to calculate  $q_{t,u}$ , as well as  $q_{t,u,tg}^k$ , in the shallow convection. In this  
 182 scheme, because the detrainment of cloud water and ice ( $D(q_l)$  and  $D(q_i)$ ) is assumed to be proportional to the total water  
 183 detrainment and the detrained air is assumed to be a representative of cumulus updraft (Park and Bretherton, 2009), we use  
 184 the ratio of tagged total water in the updraft  $q_{t,u,tg}^k$  and the corresponding sum to distribute the detrainment of tagged cloud  
 185 water and ice ( $D(q_{l,tg}^k)$  and  $D(q_{i,tg}^k)$ ):

$$186 D(q_{l,tg}^k) = \left( \frac{q_{t,u,tg}^k}{\sum_{k=1}^n q_{t,u,tg}^k} \right) \times D(q_l), \quad D(q_{i,tg}^k) = \left( \frac{q_{t,u,tg}^k}{\sum_{k=1}^n q_{t,u,tg}^k} \right) \times D(q_i) \quad (113)$$

187 This ratio is also applied to the calculations of in-cumulus tagged condensates and the production rates of tagged rain/snow  
 188 by cumulus expulsion of condensates to the environment. Tagged condensate tendencies for compensating subsidence or  
 189 upwelling, the tagged condensate tendencies due to detrained cloud water and ice without precipitation contribution, and the  
 190 updraft/penetrative entrainment mass flux of tagged total water are calculated ~~with~~using the same equations asfor the original  
 191 water-related quantities in this scheme. LikeSimilar to the calculation of the tendency of water vapour, the tendency of  
 192 tagged water vapour is computed as the difference between the tendency of tagged total water and the tendencies of tagged  
 193 condensates in non-precipitating processes within the shallow convection scheme. Like~~CAM5.1's deep convection scheme,~~  
 194 ~~The~~ shallow convection scheme relates precipitation evaporation rate  $\left(\frac{\partial q_v}{\partial t}\right)_{\text{sh\_evap}}$  to shallow convection precipitation flux  
 195  $Q_{\text{sh}}$ , ~~similar to the deep convection scheme of CAM5.1.~~ Therefore, we use an assumed expression ~~such as~~likesimilar to Eq.  
 196 (24) to calculate the tagged precipitation evaporation rate at a level  $m$ :

$$197 \left(\frac{\partial q_{v,tg}^k}{\partial t}\right)_{\text{sh\_evap}} = \begin{cases} k_e(1 - \text{RH}_m) \frac{(Q_{m,tg}^k)_{\text{sh}}}{\sqrt{\sum_{k=1}^n (Q_{m,tg}^k)_{\text{sh}}}}, & \text{if } \sum_{k=1}^n (Q_{m,tg}^k)_{\text{sh}} \neq 0 \\ 0, & \text{if } \sum_{k=1}^n (Q_{m,tg}^k)_{\text{sh}} = 0 \end{cases} \quad (12)$$

198 where  $(Q_{m,tg}^k)_{\text{sh}}$  is the tagged precipitation flux at the top interface of level  $m$ .

$$199 \left(\frac{\partial q_{v,tg}^k}{\partial t}\right)_{\text{sh\_evap}} = \frac{Q_{\text{sh,tg}}^k}{\sum_{k=1}^n Q_{\text{sh,tg}}^k} \times \left(\frac{\partial q_v}{\partial t}\right)_{\text{sh\_evap}} \quad (4)$$

200 ~~Tagged condensate tendencies for compensating subsidence or upwelling and penetrative entrainment mass flux are~~  
 201 ~~calculated with the same equations as the original water related quantities in this scheme.~~

202

### 203 2.3 Cloud Macrophysics

204 Park et al. (2014) provided a detailed description of CAM5.1's cloud macrophysics, in which cloud fractions, horizontal and  
 205 vertical overlapping structures of clouds, and net condensation rates of water vapour into cloud droplets and ice are  
 206 computed. Because the tendencies of water substances caused by cumulus convection have been calculated in deep and

shallow convection schemes, we focus on the treatment of the tagged stratus fraction and net condensation rates of tagged water vapour in stratus clouds in this section.

209

The separate liquid stratus fraction  $A_{l,st}$  is a unique function of grid-mean relative humidity (RH) over water,  $\bar{u}_l \equiv \bar{q}_v / \bar{q}_{s,w}$ , where  $\bar{q}_v$  is the grid-mean water vapour specific humidity and  $\bar{q}_{s,w}$  is the grid-mean saturation specific humidity over water, which is shown in Eq. (3) of Park et al. (2014). Then the single-phase (no separate liquid and ice phases) liquid stratus fraction is

$$A_{l,st} = (1 - A_{cu})a_{l,st} \quad (13)$$

Here  $A_{cu}$  is the total cumulus fraction.

We allocate the tagged liquid stratus fraction  $A_{l,st,tg}^k$ , which depends on the ratio of grid-mean tagged water vapour specific humidity  $\bar{q}_{v,tg}^k / \bar{q}_{s,tg}^k$  and the corresponding sum, expressed as:

$$A_{l,st,tg}^k = \left( \frac{\bar{q}_{v,tg}^k}{\sum_{k=1}^n \bar{q}_{v,tg}^k} \right) A_{l,st} \frac{\bar{q}_{s,tg}^k}{\sum_{k=1}^n \bar{q}_{s,tg}^k} \times A_{l,st}$$

(14)–(5)

The tagged grid-mean liquid stratus condensate  $\bar{q}_{l,a,tg}^k$  is calculated in the same way as the grid-mean liquid stratus condensate  $\bar{q}_{l,a}$ , but  $A_{l,st,tg}^k$  is substituted for  $A_{l,st}$ :

$$\bar{q}_{l,a,tg}^k = A_{l,st,tg}^k \times q_{l,st} \quad (15)$$

Here,  $q_{l,st}$  is the in-stratus liquid water content (LWC). This ratio is also used in the computation of tagged in-stratus liquid water content (LWC)  $q_{l,st,tg}^k$  and tagged grid-mean ambient LWC  $\bar{q}_{l,a,tg}^k$ , thus

$$q_{l,st,tg}^k = \frac{\bar{q}_{v,tg}^k}{\sum_{k=1}^n \bar{q}_{v,tg}^k} \times q_{l,st} \quad (6)$$

and

$$\bar{q}_{l,a,tg}^k = \frac{\bar{q}_{v,tg}^k}{\sum_{k=1}^n \bar{q}_{v,tg}^k} \times \bar{q}_{l,a} \quad (7)$$

228 Here,  $q_{i,se}$  is the in-stratus LWC and  $\bar{q}_{i,a}$  is the grid-mean ambient LWC. Similar to  $Aa_{i,st}$ , the ice stratus fraction  $Aa_{i,st}$  is a  
 229 function of the grid-mean total ice RH over ice,  $\bar{v}_i \equiv (\bar{q}_v + \bar{q}_i)/\bar{q}_{s,i}$ ,  $\bar{v}_i \equiv (\bar{q}_v + \bar{q}_i)/\bar{q}_{s,i}$ , where  $\bar{q}_i$  is the grid-mean ice  
 230 specific humidity and  $\bar{q}_{s,i}$  is the grid-mean saturation specific humidity over ice, as shown in Eq. (4) of Park et al. (2014).

231 Similar to  $A_{i,st}$ , the single-phase ice stratus fraction is calculated as

$$232 A_{i,st} = (1 - A_{cu})a_{i,st} \quad (16)$$

233 Like as in the treatment of  $A_{i,st,tg}^k$ , the tagged ice stratus fraction  $A_{i,st,tg}^k$  is computed based on the ratio of grid-mean total  
 234 tagged ice specific humidity ( $\bar{q}_{v,tg}^k + \bar{q}_{i,tg}^k$ ) and the corresponding sum:

$$235 A_{i,st,tg}^k = \left[ \frac{(\bar{q}_{v,tg}^k + \bar{q}_{i,tg}^k)}{\sum_{k=1}^n (\bar{q}_{v,tg}^k + \bar{q}_{i,tg}^k)} \right] A_{i,st} \quad (17)$$

236 The tagged grid-mean ice stratus condensate  $\bar{q}_{i,a,tg}^k$  is calculated in the same way as the grid-mean ice stratus condensate  $\bar{q}_{i,a}$ :

$$237 \bar{q}_{i,a,tg}^k = A_{i,st,tg}^k \times q_{i,st} \quad (18)$$

238 Here,  $q_{i,st}$  is the in-stratus ice water content (IWC). Therefore, the tagged ice stratus fraction  $A_{i,st,tg}^k$ , tagged in-stratus ice  
 239 water content (IWC)  $q_{i,st,tg}^k$  and subsequent tagged grid-mean ambient IWC  $\bar{q}_{i,a,tg}^k$  are all calculated based on the ratio of  
 240 grid-mean total tagged ice specific humidity ( $\bar{q}_{v,tg}^k + \bar{q}_{i,tg}^k$ ) and the corresponding sum, expressed as:

$$241 A_{i,st,tg}^k = \frac{(\bar{q}_{v,tg}^k + \bar{q}_{i,tg}^k)}{\sum_{k=1}^n (\bar{q}_{v,tg}^k + \bar{q}_{i,tg}^k)} \times A_{i,st} \quad (8)$$

$$242 q_{i,st,tg}^k = \frac{(\bar{q}_{v,tg}^k + \bar{q}_{i,tg}^k)}{\sum_{k=1}^n (\bar{q}_{v,tg}^k + \bar{q}_{i,tg}^k)} \times q_{i,st} \quad (9)$$

$$243 \bar{q}_{i,a,tg}^k = \frac{(\bar{q}_{v,tg}^k + \bar{q}_{i,tg}^k)}{\sum_{k=1}^n (\bar{q}_{v,tg}^k + \bar{q}_{i,tg}^k)} \times \bar{q}_{i,a} \quad (10)$$

244 Here,  $q_{i,st}$  is the in-stratus IWC and  $\bar{q}_{i,a}$  is the grid-mean ambient IWC. Using the same formula as for the calculation of the  
 245 grid-mean ambient water vapour specific humidity, the tagged grid-mean ambient water vapour specific humidity

246  $\bar{q}_{v,a,tg}^k$  is computed as follows:

$$247 \bar{q}_{v,a,tg}^k = \bar{q}_{v,tg}^k + \bar{q}_{l,tg}^k + \bar{q}_{i,tg}^k - \bar{q}_{l,a,tg}^k - \bar{q}_{i,a,tg}^k \bar{q}_{v,a,tg}^k = \bar{q}_{v,tg}^k + \bar{q}_{l,tg}^k + \bar{q}_{i,tg}^k - \bar{q}_{l,a,tg}^k - \bar{q}_{i,a,tg}^k$$

248 (19)

In CAM5.1, Park et al. (2014) defined the grid-mean net condensation rate of water vapour into liquid stratus condensate  $\bar{Q}_l$  as the time change of  $\bar{q}_{l,a}$  minus the external forcing (all processes except stratus macrophysics, including stratus microphysics, moisture turbulence, advection, and convection) of cloud droplets  $\bar{F}_l$ :

$$\bar{Q}_l = \dot{\bar{q}}_{l,a} - \bar{F}_l = A_{l,st} \dot{q}_{l,st} + \alpha q_{l,st} \dot{A}_{l,st} - \bar{F}_l \quad (20)$$

where  $\dot{\bar{q}}_{l,a}$ ,  $\dot{q}_{l,st}$ , and  $\dot{A}_{l,st}$  are the time tendency of  $\bar{q}_{l,a}$ ,  $q_{l,st}$ , and  $A_{l,st}$  during  $\Delta t = 1800$  s, respectively. In CAM5.1,  $\alpha = 0.1$  is the ratio of newly formed or dissipated stratus to the preexisting  $q_{l,st}$ . Similarly, the tagged grid-mean net condensation rate  $\bar{Q}_{l,tg}^k$  is calculated as:

$$\bar{Q}_{l,tg}^k = \dot{\bar{q}}_{l,a,tg}^k - \bar{F}_{l,tg}^k = A_{l,st,tg}^k \dot{q}_{l,st} + \alpha q_{l,st} (R \dot{A}_{l,st} + A_{l,st} \dot{R}) - \bar{F}_{l,tg}^k, \text{ and } R = \frac{\bar{q}_{v,tg}^k}{\sum_{k=1}^n \bar{q}_{v,tg}^k} \quad (21)$$

Here,  $\dot{R}$  is the tendency of  $R$  during  $\Delta t$ , and  $\bar{F}_{l,tg}^k$  is the changes of tagged cloud droplets in processes such as microphysics, moisture turbulence, advection, and deep and shallow convections.

## 2.4 Cloud Microphysics

The CAM5.1 model uses the double-moment cloud microphysical scheme described in Morrison and Gettleman-Gettelman (2008) and a modified treatment of ice supersaturation and ice nucleation from Gettleman-Gettelman et al. (2010). In addition, CAM5.1's stratus microphysics is formulated using a single-phase stratus fraction  $A_{st}$ , which is assumed as the maximum overlap between  $A_{l,st}$  and  $A_{i,st}$  (Park et al., 2014). In this study, the same assumption is applied to each tagged single-phase stratus fraction  $A_{st,tg}^k$ . The microphysical processes in CAM5.1 include condensation/deposition, evaporation/sublimation, autoconversion of cloud droplets and ice to form rain and snow, accretion of cloud droplets and ice by rain or by snow, heterogeneous freezing, homogeneous freezing, melting, sedimentation, activation of cloud droplets, and primary ice nucleation. Detailed formulations for these microphysical processes are described in Morrison and Gettleman-Gettelman (2008).

For processes such as condensation/deposition of cloud water and ice, evaporation/sublimation of cloud water and ice, conversion of cloud water to rain, conversion of cloud ice to snow, accretion of cloud water and ice, freezing of cloud water and ice and ice nucleation, the calculations of the tendencies of water substances can be regarded as terms multiplied by the stratus fraction. Therefore, the corresponding tendencies of tagged water substances are computed by multiplication by the tagged stratus fraction, while the remaining terms in the formulations remain unchanged. For calculations of melting of cloud ice and snow, evaporation/sublimation of precipitation and sedimentation of cloud water and ice, the tendencies of tagged water substances are computed using the same equations as for the original water substances but tagged variables are substituted for the original variables of the water substances. For the calculation of the tendency of activated cloud condensation nuclei, we assume that the ratio of the tendency of the tagged cloud droplets and the tendency of the original cloud droplets is equal to the ratio of  $A_{t,st,tg}^k$  and the corresponding sum  $\sum_{k=1}^n A_{t,st,tg}^k$ .

#### 2.4.1 Condensation/deposition and evaporation/sublimation of cloud water and ice

In CAM5.1, the net grid-mean evaporation/condensation rate of cloud water and ice (condensation minus evaporation)  $Q$  is calculated following Zhang et al. (2003). In this microphysics scheme, the total grid-scale condensation rates of tagged ice and tagged cloud water, as well as the total grid-scale evaporation rates of tagged cloud water and tagged ice, are calculated ~~using~~ the same formulas but the tagged variables are substituted for the corresponding original variables:

$$\left(\frac{\partial q_{i,tg}^k}{\partial t}\right)_{\text{cond}} = \min \left[ A_{st,tg}^k A, A_{st,tg}^k Q + \frac{q_{i,tg}^k}{\Delta t} \right], Q > 0_+ \quad (22)$$

and

$$\left(\frac{\partial q_{l,tg}^k}{\partial t}\right)_{\text{cond}} = \max \left[ A_{st,tg}^k Q - \left(\frac{\partial q_{i,tg}^k}{\partial t}\right)_{\text{cond}}, 0 \right], Q > 0_+ \quad (23)$$

and

$$\left(\frac{\partial q_{l,tg}^k}{\partial t}\right)_{\text{evap}} = \max \left( A_{st,tg}^k, -\frac{q_{l,tg}^k}{\Delta t} \right), Q < 0_- \quad (24)$$

and

$$\left(\frac{\partial q_{i,tg}^k}{\partial t}\right)_{\text{evap}} = \max \left[ A_{st,tg}^k Q - \left(\frac{\partial q_{l,tg}^k}{\partial t}\right)_{\text{evap}}, -\frac{q_{i,tg}^k}{\Delta t} \right], Q < 0_- \quad (25)$$

where  $A$  is the in-cloud deposition rate of water vapor onto cloud ice (see Eq. (21) of Morrison and Gettelman, 2008).

## 2.4.2 Conversion of cloud water to rain and conversion of cloud ice to snow

The grid-mean autoconversion and accretion rates of water cloud in CAM5.1 are expressed in ~~the~~ Eqs. (27) and (28) of Morrison and Gettelman (2008). Both the two rates can be regard as a term multiply by  $A_{st}$ . Therefore, the grid-mean autoconversion and accretion rates of tagged water cloud can be calculated in the same formula but  $A_{st,tg}^k$  is substituted for

$A_{st}$ :

$$\left(\frac{\partial q_{l,tg}^k}{\partial t}\right)_{\text{auto}} = \frac{A_{st,tg}^k}{A_{st}} \left(\frac{\partial q_l}{\partial t}\right)_{\text{auto}} = - \left(\frac{\partial q_{r,tg}^k}{\partial t}\right)_{\text{auto}} \quad (26)$$

and

$$\left(\frac{\partial q_{l,tg}^k}{\partial t}\right)_{\text{accr}} = \frac{A_{st,tg}^k}{A_{st}} \left(\frac{\partial q_l}{\partial t}\right)_{\text{accr}} = - \left(\frac{\partial q_{r,tg}^k}{\partial t}\right)_{\text{accw}} \quad (27)$$

where  $q_{r,tg}^k$  is the MMR of tagged stratiform rain.

Similarly, the grid-mean autoconversion rate of ice to form snow can be looked as a term multiply by  $A_{st}$  (see Eq. (29) of Morrison and Gettelman (2008)), as well as the accretion of ice followed Lin et al. (1983). Thus, the autoconversion and accretion rates of tagged ice to form snow are expressed as

$$\left(\frac{\partial q_{i,tg}^k}{\partial t}\right)_{\text{auto}} = \frac{A_{st,tg}^k}{A_{st}} \left(\frac{\partial q_i}{\partial t}\right)_{\text{auto}} = - \left(\frac{\partial q_{s,tg}^k}{\partial t}\right)_{\text{auto}} \quad (28)$$

and

$$\left(\frac{\partial q_{i,tg}^k}{\partial t}\right)_{\text{accs}} = \frac{A_{st,tg}^k}{A_{st}} \left(\frac{\partial q_i}{\partial t}\right)_{\text{accs}} = - \left(\frac{\partial q_{s,tg}^k}{\partial t}\right)_{\text{acci}} \quad (29)$$

where  $q_{s,tg}^k$  is the MMR of tagged stratiform snow.

### 2.4.3 Other collection processes

The accretion of cloud water by snow  $\left(\frac{\partial q_l}{\partial t}\right)_{\text{accs}} = -\left(\frac{\partial q_s}{\partial t}\right)_{\text{accw}}$  is attained by the continuous collection equation, whose collection efficiency is a function of the Stokes number following Thompson et al. (2004). Like Similar to the calculation of  $\left(\frac{\partial q_l}{\partial t}\right)_{\text{auto}}$ ,  $\left(\frac{\partial q_l}{\partial t}\right)_{\text{accs}}$  can be regarded as a term multiply by  $A_{l,\text{st}}$ . Thus,  $\left(\frac{\partial q_{l,tg}^k}{\partial t}\right)_{\text{accs}}$  is computed ~~in~~using the same equation but by multiplying ~~by~~with  $A_{l,\text{st},tg}^k$  instead of  $A_{l,\text{st}}$ :

$$\left(\frac{\partial q_{l,tg}^k}{\partial t}\right)_{\text{accs}} = \frac{A_{l,\text{st},tg}^k}{A_{l,\text{st}}} \left(\frac{\partial q_l}{\partial t}\right)_{\text{accs}} = -\left(\frac{\partial q_{s,tg}^k}{\partial t}\right)_{\text{accw}} \quad (30)$$

The collection of rain by snow  $\left(\frac{\partial q_r}{\partial t}\right)_{\text{coll}} = -\left(\frac{\partial q_s}{\partial t}\right)_{\text{coll}}$  can also be regarded as a term multiply~~ied~~ by  $A_{\text{st}}$ . Therefore,  $\left(\frac{\partial q_{r,tg}^k}{\partial t}\right)_{\text{coll}}$  is computed ~~in~~using the same formula but by multiplying ~~by~~with  $A_{\text{st},tg}^k$  instead of  $A_{\text{st}}$ :

$$\left(\frac{\partial q_{r,tg}^k}{\partial t}\right)_{\text{coll}} = \frac{A_{\text{st},tg}^k}{A_{\text{st}}} \left(\frac{\partial q_r}{\partial t}\right)_{\text{coll}} = -\left(\frac{\partial q_{s,tg}^k}{\partial t}\right)_{\text{coll}} \quad (31)$$

### 2.4.4 Freezing of cloud water and rain

The heterogeneous freezing of cloud water and rain is considered in CAM5.1 (Reisner et al., 1998; Morrison ~~et al~~ and Pinto, 2005). The heterogeneous freezing of tagged cloud water is computed ~~in~~using the same formula as that of original cloud water, but by multiplying ~~by~~with  $A_{l,\text{st},tg}^k$  instead of  $A_{l,\text{st}}$ :

$$\left(\frac{\partial q_{l,tg}^k}{\partial t}\right)_{\text{het}} = \frac{A_{l,\text{st},tg}^k}{A_{l,\text{st}}} \left(\frac{\partial q_l}{\partial t}\right)_{\text{het}} \quad (32)$$

Similarly, the heterogeneous freezing of tagged rain is computed ~~in~~using the same formula as that of original rain, but by multiplying ~~by~~with  $A_{\text{st},tg}^k$  instead of  $A_{\text{st}}$ :

$$\left(\frac{\partial q_{r,tg}^k}{\partial t}\right)_{\text{het}} = \frac{A_{\text{st},tg}^k}{A_{\text{st}}} \left(\frac{\partial q_r}{\partial t}\right)_{\text{het}} \quad (33)$$



331  
332  
333  
334  
335  
336  
337  
338  
339  
340  
341  
342  
343  
344  
345  
346  
347  
348  
349

The homogeneous freezing of tagged cloud droplets and tagged rain are computed ~~in~~using the same equations as those of the original cloud droplets and rain, but  $q_{l,tg}^k$  and  $S_{r,tot,tg}^k$  (the vertical integrated tagged rain source/sink term) are substituted for the original quantities:

$$\left(\frac{\partial q_{l,tg}^k}{\partial t}\right)_{\text{hom}} = \frac{\left(\frac{\partial q_l}{\partial t}\right)_{\text{hom}}}{\left(\frac{q_l}{\Delta t}\right)} \left(\frac{q_{l,tg}^k}{\Delta t}\right) = -\left(\frac{\partial q_{l,tg}^k}{\partial t}\right)_{\text{hom}} \quad (34)$$

$$\left(\frac{\partial q_{r,tg}^k}{\partial t}\right)_{\text{hom}} = \frac{\left(\frac{\partial q_r}{\partial t}\right)_{\text{hom}}}{S_{r,tot}} S_{r,tot,tg}^k = -\left(\frac{\partial q_{s,tg}^k}{\partial t}\right)_{\text{hom}} \quad (35)$$

#### 2.4.5 Melting of cloud ice and snow

Similar to the calculations of the homogeneous freezing of cloud water and rain, the melting of tagged ice and tagged snow are computed ~~in~~using the same equations as those of the original ice and snow, but  $q_{i,tg}^k$  and  $S_{s,tot,tg}^k$  (the vertical integrated tagged snow source/sink term) are substituted for the original quantities:

$$\left(\frac{\partial q_{i,tg}^k}{\partial t}\right)_{\text{melt}} = \frac{\left(\frac{\partial q_i}{\partial t}\right)_{\text{melt}}}{\left(\frac{q_i}{\Delta t}\right)} \left(\frac{q_{i,tg}^k}{\Delta t}\right) = -\left(\frac{\partial q_{i,tg}^k}{\partial t}\right)_{\text{melt}} \quad (36)$$

$$\left(\frac{\partial q_{s,tg}^k}{\partial t}\right)_{\text{melt}} = \frac{\left(\frac{\partial q_s}{\partial t}\right)_{\text{melt}}}{S_{s,tot}} \times S_{s,tot,tg}^k = -\left(\frac{\partial q_{r,tg}^k}{\partial t}\right)_{\text{melt}} \quad (37)$$

#### 2.4.6 Evaporation/sublimation of precipitation

For the calculations of the evaporation of tagged rain and the sublimation of tagged snow, both them are calculated ~~in~~using the same formula as original quantities but  $A_{st,tg}^k$  is substituted for  $A_{st}$ :

$$\left(\frac{\partial q_{r,tg}^k}{\partial t}\right)_{\text{evap}} = \frac{A_{st,tg}^k}{A_{st}} \left(\frac{\partial q_r}{\partial t}\right)_{\text{evap}} \quad (38)$$

and

$$\left(\frac{\partial q_{s,tg}^k}{\partial t}\right)_{\text{evap}} = \frac{A_{\text{st},tg}^k}{A_{\text{st}}} \left(\frac{\partial q_s}{\partial t}\right)_{\text{evap}} \quad (39)$$

## 2.4.7 Sedimentation of cloud water and ice

The time tendencies  $\left(\frac{\partial q_l}{\partial t}\right)_{\text{sed}}$  and  $\left(\frac{\partial q_i}{\partial t}\right)_{\text{sed}}$  of cloud water and ice for sedimentation, as well as those  $\left(\frac{\partial q_{l,tg}^k}{\partial t}\right)_{\text{sed}}$  and  $\left(\frac{\partial q_{i,tg}^k}{\partial t}\right)_{\text{sed}}$  of tagged cloud water and tagged ice, are calculated with a simple forward differencing scheme in the vertical dimension (Morrison and Gettelman, 2008). In CAM5.1, the sedimentation of cloud water and ice can lead to evaporation or sublimation when the cloud fraction at the level above is larger than the cloud fraction at the given level and the evaporation or condensation rate is assumed to be proportional to the difference in cloud fraction between the levels. This assumption is also applied to calculate the evaporation of tagged cloud water or sublimation of tagged ice, when the tagged cloud fraction at the level above is larger than the tagged cloud fraction at the given level.

## 2.4.8 The diagnosis of precipitation

The grid-scale time tendency of the MMR of precipitation  $q_p$  in CAM5.1's microphysics is expressed as:

$$\frac{\partial q_p}{\partial t} = \frac{1}{\rho} \frac{\partial (V_q \rho q_p)}{\partial z} + S_q \quad (40)$$

where  $z$  is height,  $V_q$  is the mass-weighted terminal fall speeds (see Eq. (18) of Morrison and Gettelman (2008)), and  $S_q$  is the grid-mean source/sink terms for  $q_p$ :

$$S_q = \left(\frac{\partial q_p}{\partial t}\right)_{\text{auto}} + \left(\frac{\partial q_p}{\partial t}\right)_{\text{accw}} + \left(\frac{\partial q_p}{\partial t}\right)_{\text{acci}} + \left(\frac{\partial q_p}{\partial t}\right)_{\text{het}} + \left(\frac{\partial q_p}{\partial t}\right)_{\text{hom}} + \left(\frac{\partial q_p}{\partial t}\right)_{\text{melt}} + \left(\frac{\partial q_p}{\partial t}\right)_{\text{evap}} + \left(\frac{\partial q_p}{\partial t}\right)_{\text{coll}} \quad (41)$$

For the diagnostic treatments of tagged rain and tagged snow, the  $q_p$  in Eqs. (40) and (41) is replaced by  $q_{r,tg}^k$  and  $q_{s,tg}^k$  respectively.

## 370 2.5 Advection

371 The finite volume dynamical core is chosen in this study due to its excellent properties for tracer transport (Rasch et al.,  
372 2006). The CAM5.1 model can be driven by offline meteorological fields (Lamarque et al., 2012) following the procedure  
373 initially developed for the Model of Atmospheric Transport and Chemistry (MARCH) (Rasch et al., 1997). [This procedure](#)  
374 [allows for more accurate comparisons between measurements of atmospheric composition and CAM5.1's output \(Lamarque](#)  
375 [et al., 2012\).](#) In this study, the external meteorological fields are obtained from Modern Era Retrospective-analysis for  
376 Research and Applications (MERRA) datasets (Rienecker et al., 2011), whose horizontal resolution is identical to CAM5.1's  
377 [and time resolution is 6 h. In the simulation procedure, the zonal and meridional wind components, air temperature, surface](#)  
378 [pressure, surface temperature, surface geopotential, surface stress, and sensible and latent heat fluxes are read from the](#)  
379 [MERRA datasets to drive CAM5.1 \(Lamarque et al., 2012\). To prevent jumps, all input fields are linearly interpolated at](#)  
380 [timesteps between the reading times. And later, these fields are used to drive the CAM5.1's parameterizations to generate](#)  
381 [the necessary variables and calculate subgrid scale transport and the hydrological cycle \(Lamarque et al., 2012\).](#) Temporal  
382 evolutions of  $q_{v,tg}^k$ ,  $q_{l,tg}^k$  and  $q_{i,tg}^k$  in the advective process are treated in the same manner as other constituents without any  
383 modification.

384

## 385 2.6 Vertical diffusion

386 CAM5.1's moist turbulence scheme is taken from the scheme presented by Bretherton and Park (2009), which calculates the  
387 vertical transport of heat, moisture, horizontal momentum, and tracers by symmetric turbulences. The vertical diffusion of  
388 tagged water substances is treated by the procedure in the same way as other constituents without any modification.

389

## 390 2.7 Adjustment

391 Ideally, the differences between the MMRs of water substances and the summed MMRs of all corresponding tagged water  
392 substances should be zero. However, there are exceptional differences in a few grid points (see supplementary Fig. S6). ~~It~~

~~the supplement, Supplementary~~ Figs. S1–S5 show comparisons between the tendencies of the original water substances and the sum of the tendencies of the tagged water substances for the relevant physical processes described in Sects. 2.1 through 2.6. Although differences are small for most grid points, some abnormal values still appear randomly. For tagged water vapour, evident biases mainly occur in deep convection, cloud processes (cloud macrophysics and microphysics), and advection in the tropics; for tagged cloud droplets, the apparent biases generally occur in cloud processes ~~in the tropics~~; for tagged cloud ice, the main differences occur in cloud processes, advection, and vertical diffusion. Nonlinearities in the calculations of the tendencies of water substances in the physical schemes cause these differences. A bias occurred in one physical parameterization can affect the calculations of the tendencies of tagged water substances in other parameterizations, since there are interactions among various physical and dynamical processes in CAM5.1. Eventually, evidently clear differences between the summed MMRs of tagged water substances and the MMRs of original water substances may occur, as shown in Fig. S6. To reduce these accumulated biases in the relevant physical schemes, additional criteria are applied to the relevant quantities of the tagged water substances:

(1) If the positive or negative sign of the tendency of a tagged water substance is identical to the sign of the tendency of the original water substance, the absolute value of the tendency of the tagged water substance should not be larger than that of the original water substance. If their signs are different, the tendency of the tagged water substance is set to zero. This adjustment can be expressed as:

$$\frac{\partial q_{tg}^k}{\partial t} = \begin{cases} \max\left(\frac{\partial q_{tg}^k}{\partial t}, \frac{\partial q}{\partial t}\right), & \text{if } \frac{\partial q_{tg}^k}{\partial t} \geq 0 \text{ and } \frac{\partial q}{\partial t} \geq 0 \\ \min\left(\frac{\partial q_{tg}^k}{\partial t}, \frac{\partial q}{\partial t}\right), & \text{if } \frac{\partial q_{tg}^k}{\partial t} \leq 0 \text{ and } \frac{\partial q}{\partial t} < 0 \\ 0, & \text{if } \left(\frac{\partial q_{tg}^k}{\partial t} < 0 \text{ and } \frac{\partial q}{\partial t} \geq 0\right) \text{ or } \left(\frac{\partial q_{tg}^k}{\partial t} > 0 \text{ and } \frac{\partial q}{\partial t} < 0\right) \end{cases} \quad (42)$$

where  $\frac{\partial q_{tg}^k}{\partial t}$  and  $\frac{\partial q}{\partial t}$  represent the tendency of the tagged water substances and the tendency of the corresponding original water substance in a given physical process, respectively.

(2) After the adjustment in Eq. (42) being applied, the The sum of the tendencies of all tagged water substances should be equal to the tendency of the corresponding original water substance in each scheme. This adjustment can be described as follows:

$$\frac{\partial q_{tg}^k}{\partial t} = \begin{cases} R_q \left( \frac{\partial q_{tg}^k}{\partial t} \right), & \text{if } \sum_{k=1}^n \left( \frac{\partial q_{tg}^k}{\partial t} \right) \neq 0, \text{ here } R_q = \frac{\frac{\partial q}{\partial t}}{\sum_{k=1}^n \left( \frac{\partial q_{tg}^k}{\partial t} \right)} \\ \frac{1}{n} \left( \frac{\partial q_{tg}^k}{\partial t} \right), & \text{if } \sum_{k=1}^n \left( \frac{\partial q_{tg}^k}{\partial t} \right) = 0. \end{cases} \quad (43)$$

### 3. Results and discussion

#### 3.1 Model assessment

Numaguti (1999) pointed out that the results of the tagged AWTs method suffer from the bias of the model used. Therefore, we first estimate the precipitation ~~simulated by the offline version in the specified dynamics simulation~~ of CAM5.1, which is compared ~~with to~~ the Global Precipitation Climatology Project (GPCP) version 2.2 combined precipitation data set (Huffman and Bolvin, 2011), as shown in Fig. 2. In winter (December, January and February), high-precipitation zones are located in the tropics of the Southern Hemisphere and in the mid-latitude areas of the NWP. Precipitation is generally less than 3 mm d<sup>-1</sup> over most parts of Eurasia. In summer (June, July and August), there is heavy precipitation over the southern and southeastern parts of Eurasia and over central Africa. Although CAM5.1 generally shows a bias toward ~~s~~ relatively high precipitation in the tropics of the summer hemisphere, the precipitation pattern and amount over Eurasia and its adjacent areas is captured well by CAM5.1. In addition, the water vapour data from the Atmospheric Infrared Sounder (AIRS) and wind fields data from National Centers for Environmental Prediction (NCEP) are ~~also~~ used to assess the CAM5.1's results, as shown in Fig. S7. Overall, the water vapour and horizontal wind fields can be well simulated by CAM5.1.

#### 3.2 Terrestrial and oceanic contributions to precipitation over Eurasia

Figure 3 shows the spatial distribution of the relative contribution of evaporation from all land source regions to precipitation (colours). In winter, evaporation from land source regions generally contributes ~30–60% to the precipitation over Eurasia. The largest contribution (~80%) is located in central China. In summer, ≥60% of precipitation over most parts of Eurasia is

435 supplied by evaporation from land, especially for the inland region where  $\geq 80\%$  of precipitation originates from the land  
436 surface. However, the contribution of evaporation from land to summer precipitation over IND, ICP, and east China is  
437 generally less than 50%, due to moisture transport by the Indian summer monsoon and EASM. Overall, the contribution of  
438 evaporation from land to precipitation over Eurasia is smaller in winter and larger in summer, which is consistent with the  
439 variation of evaporation from the land surface over Eurasia in winter and summer as shown in Fig. 4. The pattern of  
440 precipitation contributed by land evaporation is similar to that shown in Numaguti (1999). Our result is close to that of  
441 Numaguti (1999) for summer but the contribution of land evaporation to precipitation is evidently larger for winter.

442

443 The distributions of the relative contributions of evaporation from the NAO, the extended north Indian Ocean (includes NIO,  
444 BOB, and AS), and the extended Northwest Pacific (includes NWP and SCS), which are three important moisture source  
445 regions, are shown in Fig. 5. In winter,  $\sim 10\text{--}60\%$  of the precipitation over the northern part of Eurasia originates from the  
446 NAO, with a westward or northwestward increasing gradient in the relative contribution. The extended north Indian Ocean  
447 supplies moisture for  $\sim 10\text{--}30\%$  of the precipitation over the North Africa and South Asia. The extended Northwest Pacific  
448 only provides moisture for  $10\text{--}30\%$  of the precipitation over the southern and eastern coastal regions of Asia. In summer,  
449 evaporation from the NAO only affects precipitation over Europe, with a contribution of  $10\text{--}30\%$  to total precipitation.  
450 Precipitation areas influenced by the extended north Indian Ocean extend to EA, while areas impacted by the extended  
451 Northwest Pacific retreat eastward.

452

453 The arrow streamlines in Fig. 3 show the total tropospheric water vapour flux in winter and summer. There is a westward  
454 component of water vapour flux over the tropics of both the extended north Indian Ocean and the extended Northwest  
455 Pacific in the Northern Hemisphere in winter. In summer, there is a very large northwestward water vapour flux over the  
456 NIO, turning northeastward over the BOB and AS. Over the extended Northwest Pacific, there is a northward component of  
457 water vapour flux at  $30^\circ\text{--}60^\circ\text{N}$  and a westward flux in the tropics between  $120^\circ\text{E}$  and  $180^\circ\text{E}$ . In addition, Fig. 4 shows strong  
458 surface evaporation over the NWP and NAO in winter, while evaporation is weaker in summer. In contrast, evaporation over  
459 the NIO is larger in summer and smaller in winter. These results help to explain the variations in the contributions of the

NAO, extended north Indian Ocean, and extended Northwest Pacific to precipitation in winter and summer as shown in Fig. 5.

The overall contributions from these three oceanic regions are generally less than those in Numaguti (1999). The resolution of the climate model used in Numaguti (1999) is  $\sim 5.6^\circ$ , both in latitudinal and longitudinal direction. The different model resolutions are a probable reason for the different quantitative contributions in our study and that of Numaguti (1999). In addition, CAM5.1 is driven by MERRA data, so its surface evaporation flux is approximate to that of MERRA. MERRA land evaporation is larger over South and East Asia and Northern Europe compared to other global estimates (Jiménez et al., 2011), and Bosilovich et al. (2011) suggested that MERRA ocean evaporation is lower compared to other reanalyses but is much closer to observation. Therefore, the bias in MERRA surface evaporation may lead to the higher land contribution and lower oceanic contribution to precipitation.

### 3.3 Atmospheric moisture source attribution of precipitation and water vapour over the YRV

Figures 6a and 6b show the time series of evaporative contribution of each source region to precipitation over the YRV. The contributions of evaporation to precipitation from the BOB and AS are lower during autumn–winter and higher during spring–summer with relative contributions of  $\leq 3.69\%$ . Chow et al. (2008) (see their Fig. 20a) also found that evaporation from the AS had little impact on precipitation over China. Supplementary Figs. S7S10–S13 show the distributions of 25 tagged water vapour tracers and 25 tagged precipitations over Eurasia and surrounding areas in winter and summer. Figs. S107a and S129a show that evaporation from the BOB contributes to water vapour and precipitation over the extended north Indian Ocean in winter, corresponding to the direction of water flux shown in Fig. 3a. The centre of BOB-contributed precipitation ( $15 \text{ mg m}^{-2} \text{ s}^{-1}$ ) is located in the south of the TP in summer (Fig. S40aS13a). In addition, the BOB supplies moisture to areas around the northeastern BOB in summer (Fig. S8aS11a). The contribution of the SCS to precipitation is also very small ( $\leq 4.73.4\%$ ), which supports the view of Chow et al. (2008), who suggested that the SCS may serve as a pathway for water vapour transport from the southwesterly flow of the Indian summer monsoon and the easterly flow of the

Northwest Pacific subtropical high. A detailed discussion of this issue is presented in Sect. 3.5. The NWP serves as the dominant oceanic source region for precipitation over the YRV during the whole year except during June and July. The relative contribution is  $\sim 7.78.1-10.410.6\%$  in June and July and  $14.415.8-22.924.6\%$  in other months. As shown in Fig.3, there is strong westward water vapour flux over  $20^{\circ}$ - $45^{\circ}$  N for the NWP and southwestward water vapour flux over the tropics of the NWP. ButHowever, there is no evident moisture transports from the NWP to EA in the long term mean water vapour flux. Following-the- Eq. (S1)-in-the-supplement, the water vapour flux is divided into the stationary and transient components, as shown in Figs. S8-S9. Figure S8c shows that-tThe transient component of the meridional flux brings some of the moisture from south over most of the NWP and the north of the SCS (Fig. S8c), and-Fig. S9e shows that- the transient component of the zonal flux leads to westwards water vapour transport over  $20^{\circ}$ - $30^{\circ}$  N for the NWP (Fig. S9c). Both the two-transient components indicate that the synoptic disturbances can bring moisture originating from the NWP to the southern and eastern coastal regions of Asia during winter. Evaporation from the NIO shows a clear contribution to precipitation during May to October. Especially in June and JulyIn particular, the NIO is the dominant oceanic source region in June and July, with a contribution of  $\sim 22.530\%$ . This is in agreement with the result of a Lagrangian diagnostic method described in Baker et al. (2015) and the results of sensitivity experiments in Chow et al. (2008). However, in other months, the contribution of the NIO is very small. The contributions from evaporation from the BOB, AS, and NIO are in phase with the EASM, which was also reported by Baker et al. (2015). The ICP is an important terrestrial source region for the YRV precipitation, supplying moisture to  $\sim 9.89\%$  of the annual precipitation. The relative contribution of the ICP from April to September is close to the result of Wei et al. (2012). The contribution of evaporation from the YRV to its precipitation can be regarded as the local recycling ratio, which is lower ( $5.94.5-97.4\%$ ) in summer and higher ( $119.2-14.113.4\%$ ) in other seasons. In general, the contribution of evaporation from SCN is comparable to the local contribution of the YRV. The relative contribution from the NEA is higher in autumn-winter and lower in spring-summer, which may be associated with the shift of the EA monsoon. Though the individual contributions of evaporation from the YRV or SCN are smaller than those from the NIO in summer, their combined contributions exceed 10%. This implies that evaporation from these two regions is important for precipitation over China. This is contrary to the view expressed in Simmonds et al. (1999) and Qian et al. (2004), but consistent with Wei et al. (2012). Figures 6c and 6d show a time series of evaporative contribution from



each source region to the tropospheric water vapour amount over the YRV. The overall relative contribution from each source region to the total water vapour amount is similar to the corresponding relative contribution to precipitation shown in Figs. 6a and 6b.

512

### 3.4 Atmospheric moisture source attribution of precipitation and water vapour over SCN

Figures 7a and 7b show the contribution of each source region to precipitation over SCN. The NIO is the dominant source region in summer, while the NWP dominates precipitation over SCN during other seasons, which is similar to the situation over the YRV. The contribution from the NIO is ~~21.5~~28.4–~~28.1~~37.8% in summer. The contribution from the NWP is ~~8.27~~–~~15.7~~17.2% in summer and ~~20~~15.3–~~33.4~~37.2% during other seasons. During spring and summer, ~~2.2~~–~~4~~4% of precipitation is supplied from the BOB, with smaller contributions during other seasons. The contribution from the AS is similar to that of the BOB. In summer, only ~~32.7~~–~~4.23~~7% of precipitation originates from the SCS, but the area contributes ~~76.7~~–~~7.37~~% to the precipitation in early spring (March to April). ~~Like Similar to~~ precipitation over the YRV, the dominant terrestrial source region for SCN is the ICP, which contributes ~~9.99~~9.8% to the precipitation. In addition, ~~5.75~~5.6% of summer precipitation originates from SEA. Compared to precipitation over the YRV, the contribution from the TP is smaller. In addition, the contribution from the YRV is small in summer. The local recycling ratio or percentage contribution of evaporation from SCN is generally ~~5.54~~3–~~8.87~~2% during May to September, but larger than ~~109.3~~% during the remaining months. As shown in Fig. 7d, the overall relative contribution of each source region to the water vapour amount is similar to each region's contribution to precipitation over SCN.

527

### 3.5 Atmospheric moisture source attribution of water vapour over the SCS

Simmonds et al. (1999) and Lau et al. (2002) suggested that interannual variation of summer precipitation over China is associated with water vapour transport over the SCS. However, Chow et al. (2008) suggested that the SCS may act as a water vapour transport pathway where the southwesterly stream of the Indian summer monsoon and the easterly stream of

the southeastern Asian monsoon meet. Previous studies have conducted sensitivity experiments or analysed the water vapour budget to indirectly determine moisture sources for the SCS. In contrast, our AWT method can directly quantify the contribution of each source region to the water vapour amount over the SCS, which is shown in Fig. 8. The local contribution of the SCS is small ( $\sim 5.4.7-5.85.5\%$ ) in summer, and the mean contribution in other months is  $\sim 7.46.8\%$ . The contribution of the NIO shows clear seasonal variations: the contribution is high during May to October, but very small during the other months. Similar to the results for water vapour over the YRV and SCN, the NIO is the dominant source region from June to September, with a contribution of  $20.822.7-26.931\%$ . During this period, the contribution of the NWP is  $43.314.1-49.21.2\%$ . However, the NWP dominates the water vapour over the SCS in the remaining months, with contributions of  $23.825.7-45.451.3\%$ . In addition, the SP and NEP are also important oceanic source regions, with combined annual contributions of  $\sim 43.11-47.716.6\%$ . The most important terrestrial moisture source region is the SEA, whose contribution is larger ( $13.78-16.42\%$ ) in summer and smaller ( $\sim 6.45.3\%$ ) in winter. During late autumn to winter, about  $5.23-6.23\%$  of water vapour is supplied from NEA, but its contribution is very small in other seasons. The other land source regions contribute relatively little to the water vapour amount over the SCS.

545

From the SCS to SCN and further to the YRV (from south to north), surface evaporation from the SCS generally represents a small ( $\leq 5.85\%$ ) contribution to the water vapour amount over the three target areas in summer. In contrast, much more water vapour is supplied by evaporation from the NWP and NIO. This confirms the inference proposed by Chow et al. (2008) that the SCS is a water vapour transport pathway where moisture from the NIO and NWP meet in summer.

550

#### 551 4. Conclusions

In this study, an Eulerian tagged AWT method was implemented in CAM5.1, which provides the capacity to separately trace the behaviour of atmospheric water substances originating from various moisture source regions and to quantify their contributions to atmospheric water over an arbitrary region. Numaguti (1999) pointed out that the weakness of the tagged AWT method is that its results suffer from the performance of the model in reproducing the hydrological cycle. However, a

556 comparison between GPCP and CAM5.1 precipitation shows that CAM5.1 has the capability to represent [total](#) precipitation  
557 [processes](#). [CAM5.1 also can reproduce water vapour and large scale circulation reasonable, as compared to AIRS and NCEP](#)  
558 [data](#). Using this method, we investigated the contribution of evaporation from land, as well as the contributions from the  
559 [North Atlantic Ocean](#), [NAO](#), extended north Indian Ocean, and extended Northwest Pacific to precipitation over Eurasia. Our  
560 results are similar to those of Numaguti (1999), except that our results indicate a larger contribution from terrestrial source  
561 regions, while the three oceanic regions show smaller contributions. Different model resolutions and a bias in MERRA  
562 surface evaporation are probable causes for the differences between our results and those of Numaguti (1999).

563

564 We then investigated the contribution of various source regions to precipitation and water vapour amounts over the YRV and  
565 SCN. Our results suggest that the dominant oceanic moisture source region during summer is the NIO (~~15.9~~20.5–~~22.5~~30.3%  
566 of precipitation over the YRV; ~~21.5~~28.4–~~28.1~~37.8% of precipitation over SCN), consistent with Baker et al. (2015) and  
567 Chow et al. (2008), while during other seasons, the NWP is the dominant source region (~~14.3~~15.8–~~22.9~~24.6% of  
568 precipitation over the YRV; ~~14.4~~15.3–~~34.1~~37.1% of precipitation over SCN), with smaller contributions from the BOB, AS,  
569 and SCS. The ICP is an important terrestrial source region, with a mean annual contribution of ~10%. For precipitation over  
570 the YRV, the combined contribution of evaporation from the YRV and SCN is non-negligible (exceeding 10%), consistent  
571 with Wei et al. (2012). For precipitation over SCN, the local recycling ratio is generally ~~5.5~~4.3–~~8.8~~7.2% during May to  
572 September, and reaches ~~11.1~~9.4–~~19.6~~18.7% in other months. The contribution from the YRV is very small in summer. The  
573 overall relative contribution of each source region to the water vapour amount is similar to the corresponding contribution to  
574 precipitation over the YRV and SCN.

575

576 An analysis of water vapour amount over the SCS shows that the NIO is the dominant source region (~~20.8~~22.7–~~26.9~~31% of  
577 water vapour) during June to September, while the NWP dominates (~~23.8~~25.7–~~45.1~~51.3% of water vapour) in the remaining  
578 months. In contrast, the local contribution of the SCS is smaller (~~~54.7~~–~~5.8~~5.5%) in summer. In addition, the SP, NEP, and  
579 SEA are also important source regions. Evaporation over the SCS represents a small contribution to water vapour amounts

580 | over the SCS, SCN, and the YRV in summer, implying that the SCS acts as a water vapour transport pathway rather than a  
581 | dominant source region, which confirms the inference of Chow et al. (2008).

582

583 | At present, the tagged AWT method has only been applied to a few GCMs and regional models, and has generally focused  
584 | on identifying the moisture distribution over a few regions such as ~~NAM~~-North America (Bosilovich and Schubert, 2002;  
585 | Bosilovich et al., 2003). We expect that the AWT method will be applied to additional models and used to identify moisture  
586 | sources over more climate regions, which will improve our understanding of atmospheric moisture transport.

587

## 588 | **Code availability**

589 | The source code modifications for CAM5.1 are available from the authors. Interested readers should contact us via  
590 | [arthur\\_pc@163.com](mailto:arthur_pc@163.com) or [binzhu@nuist.edu.cn](mailto:binzhu@nuist.edu.cn).

591

## 592 | **Acknowledgements:**

593 | This work is supported by grants from the National Natural Science Foundation of China (Grant No. 91544229), the  
594 | National Key Research and Development Program of China (2016YFA0602003), and the projects of China Special Fund for  
595 | Meteorological Research in the Public Interest (GYHY201406001).

596

## 597 | **References**

598 | Baker, A. J., Sodemann, H., Baldini, J. U. L., Breitenbach, S. F. M., Johnson, K. R., van Hunen, J., and Zhang, P.:  
599 | Seasonality of westerly moisture transport in the East Asian summer monsoon and its implications for interpreting  
600 | precipitation  $\delta^{18}\text{O}$ , J. Geophys. Res. Atmos., 120(12), 5850–5862, doi:10.1002/2014JD022919, 2015.

601 Bosilovich, M. G.: On the vertical distribution of local and remote sources of water for precipitation, Meteorol. Atmos. Phys.,  
602 80(1), 31–41, doi:10.1007/s007030200012, 2002.

603 Bosilovich, M. G. and Schubert, S. D.: Water vapor tracers as diagnostics of the regional hydrologic cycle, J.  
604 Hydrometeorol., 3(2), 149–165, doi:http://dx.doi.org/10.1175/1525-7541(2002)003<0149:WVTADO>2.0.CO;2, 2002.

605 Bosilovich, M. G., Robertson, F. R., Chen, J.: Global energy and water budgets in MERRA, J. Climate, 24(22), 5721–5739,  
606 doi:http://dx.doi.org/10.1175/2011JCLI4175.1, 2011.

607 Bosilovich, M. G., Sud, Y. C., Schubert, S. D., and Walker, G. K.: Numerical simulation of the large-scale North American  
608 monsoon water sources, J. Geophys. Res. Atmos., 108(D16), 8614, doi:10.1029/2002JD003095, 2003.

609 Bretherton, C. S., McCaa, J. R., and Grenier, H.: A new parameterization for shallow cumulus convection and its application  
610 to marine subtropical cloud-topped boundary layers. Part I: Description and 1D results, Mon. Wea. Rev., 132(4), 864–  
611 882, doi:http://dx.doi.org/10.1175/1520-0493(2004)132<0883:ANPFSC>2.0.CO;2, 2004.

612 Bretherton, C. S. and Park, S.: A new moist turbulence parameterization in the Community Atmosphere Model, J. Climate,  
613 22(12), 3422–3448, doi:http://dx.doi.org/10.1175/2008JCLI2556.1, 2009.

614 Brubaker, K. L., Entekhabi, D., and Eagleson, P. S.: Estimation of continental precipitation recycling, J. Clim., 6(6), 1077–  
615 1089, doi:http://dx.doi.org/10.1175/1520-0442(1993)006<1077:EOCPR>2.0.CO;2, 1993.

616 Burde, G. I. and Zangvil, A.: The estimation of regional precipitation recycling. Part I: Review of recycling models, J. Clim.,  
617 14(12), 2497–2508, doi:http://dx.doi.org/10.1175/1520-0442(2001)014<2497:TEORPR>2.0.CO;2, 2001.

618 Chen, B., Xu, X. D., and Zhao, T.: Main moisture sources affecting lower Yangtze River Basin in boreal summers during  
619 2004–2009, Int. J. Climatol., 33(4), 1035–1046, doi:10.1002/joc.3495, 2013.

620 Chow, K. C., Tong, H. W., and Chan, J. C.: Water vapor sources associated with the early summer precipitation over China,  
621 Clim. Dynam., 30(5), 497–517, doi:10.1007/s00382-007-0301-6, 2008.

622 Dirmeyer, P. A. and Brubaker, K. L.: Contrasting evaporative moisture sources during the drought of 1988 and the flood of  
623 1993, J. Geophys. Res., 104(D16), 19383–19397, doi:10.1029/1999JD900222, 1999.

624 Drumond, A., Nieto, R., and Gimeno, L.: Sources of moisture for China and their variations during drier and wetter  
625 conditions in 2000–2004: a Lagrangian approach, Clim. Res., 5, 215–225, doi:10.3354/cr01043, 2011.

626 Eltahir, E. A. and Bras, R. L.: Precipitation recycling, *Rev. Geophys.*, 34(3), 367–378, doi:10.1029/96RG01927, 1996.

627 Emmons, L. K., Walters, S., Hess, P. G., Lamarque, J.-F., Pfister, G. G., Fillmore, D., Granier, C., Guenther, A., Kinnison,  
628 D., Laepple, T., Orlando, J., Tie, X., Tyndall, G., Wiedinmyer, C., Baughcum, S. L., and Kloster, S.: Description and  
629 evaluation of the Model for Ozone and Related chemical Tracers, version 4 (MOZART-4), *Geosci. Model Dev.*, 3(1),  
630 43–67, doi:10.5194/gmd-3-43-2010, 2010.

631 Gettelman, A., Liu, X., Ghan, S. J., Morrison, H., Park, S., Conley, A. J., Klein, S. A., Boyle, J., Mitchell, D. L., and Li, J.-L.  
632 F.: Global simulations of ice nucleation and ice supersaturation with an improved cloud scheme in the Community  
633 Atmosphere Model, *J. Geophys. Res.*, 115, D18216, doi:10.1029/2009JD013797, 2010.

634 Gimeno, L., Stohl, A., Trigo, R. M., Dominguez, F., Yoshimura, K., Yu, L., Drumond, A., Durán-Quesada, A. M., and Nieto,  
635 R.: Oceanic and terrestrial sources of continental precipitation, *Rev. Geophys.*, 50, RG4003,  
636 doi:10.1029/2012RG000389, 2012.

637 Gustafsson, M., Rayner, D. and Chen, D.: Extreme rainfall events in southern Sweden: where does the moisture come from?  
638 *Tellus A*, 62, 605–616, doi:10.1111/j.1600-0870.2010.00456.x, 2010.

639 Held, I. M. and Soden, B. J.: Water vapor feedback and global warming, *Annu. Rev. Energy Environ.*, 25, 441–475,  
640 doi:10.1146/annurev.energy.25.1.441, 2000.

641 Horowitz, L. W., Walters, S., Mauzerall, D. L., Emmons, L. K., Rasch, P. J., Granier, C., Tie, X. X., Lamarque, J.-F.,  
642 Schultz, M. G., Tyndall, G. S., Orlando, J. J., and Brasseur, G. P.: A global simulation of tropospheric ozone and related  
643 tracers: Description and evaluation of MOZART, version 2, *J. Geophys. Res.*, 108, 4784, doi:10.1029/2002JD002853,  
644 2003.

645 Huffman, G. J. and Bolvin, D. T.: GPCP version 2.2 combined precipitation data set documentation, NASA Goddard Space  
646 Flight Center, Mesoscale Atmospheric Processes Laboratory and Science Systems and Applications, Inc., 2011.

647 Jiménez, C., Prigent, C., Mueller, B., Seneviratne, S. I., McCabe, M. F., Wood, E. F., Rossow, W. B., Balsamo, G., Betts, A.  
648 K., Dirmeyer, P. A., Fisher, J. B., Jung, M., Kanamitsu, M., Reichle, R. H., Reichstein, M., Rodell, M., Sheffield, J., Tu,  
649 K., and Wang, K.: Global intercomparison of 12 land surface heat flux estimates, *J. Geophys. Res.*, 116, D02102,  
650 doi:10.1029/2010JD014545, 2011.

651 Joussaume, S., Sadourny, R., and Vignal, C.: Origin of precipitating water in a numerical simulation of the July climate,  
652 Ocean-Air Inter., 1, 43–56, 1986.

653 Knoche, H. R. and Kunstmann, H.: Tracking atmospheric water pathways by direct evaporation tagging: A case study for  
654 West Africa, J. Geophys. Res. Atmos., 118, 12345–12358, doi:10.1002/2013JD019976, 2013.

655 Koster, R., Jouzel, J., Suozzo, R., Russell, G., Broecker, W., Rind, D., and Eagleson, P.: Global sources of local precipitation  
656 as determined by the NASA/GISS GCM, Geophys. Res. Lett., 13(2), 121–124, doi:10.1029/GL013i002p00121, 1986.

657 Lamarque, J.-F., Emmons, L. K., Hess, P. G., Kinnison, D. E., Tilmes, S., Vitt, F., Heald, C. L., Holland, E. A., Lauritzen, P.  
658 H., Neu, J., Orlando, J. J., Rasch, P. J., and Tyndall, G. K.: CAM-chem: description and evaluation of interactive  
659 atmospheric chemistry in the Community Earth System Model, Geosci. Model Dev., 5, 369–411, doi:10.5194/gmd-5-  
660 369-2012, 2012.

661 Lau, K. M., Li, X., and Wu, H. T.: Evolution of the large scale circulation, cloud structure and regional water cycle  
662 associated with the South China Sea monsoon during May–June, 1998, J. Meteor. Soc. Japan. Ser. II, 80(5), 1129–1147,  
663 doi:10.2151/jmsj.80.1129, 2002.

664 Lin, Y. L., Farley, R. D., and Orville, H. D.: Bulk parameterization of the snow field in a cloud model, J. Climate Appl.  
665 Meteor., 22(6), 1065–1092, doi:http://dx.doi.org/10.1175/1520-0450(1983)022<1065:BPOTSF>2.0.CO;2, 1983.

666 Morrison, H. and Gettelman, A.: A new two-moment bulk stratiform cloud microphysics scheme in the Community  
667 Atmosphere Model, version 3 (CAM3). Part I: Description and numerical tests, J. Climate, 21(15), 3642–3659,  
668 doi:http://dx.doi.org/10.1175/2008JCLI2105.1, 2008.

669 Morrison, H. and Pinto, J. O.: Mesoscale modeling of springtime Arctic mixed-phase stratiform clouds using a new two-  
670 moment bulk microphysics scheme, J. Atmos. Sci., 62(10), 3683–3704, doi:http://dx.doi.org/10.1175/JAS3564.1, 2005.

671 Neale, R. B., Chen, C.-C., Gettelman, A., Lauritzen, P. H., Park, S., Williamson, D. L., Conley, A. J., Garcia, R., Kinnison,  
672 D., Lamarque, J.-F., Marsh, D., Mills, M., Smith, A. K., Tilmes, S., Vitt, F., Morrison, H., Geron-Smith, P., Collins,  
673 W. D., Iacono, M. J., Easter, R. C., Ghan, S. J., Liu, X., Rasch, P. J., and Taylor, M. A.: Description of the NCAR  
674 Community Atmosphere Model (CAM5), NCAR Technical Note NCAR/TN-486+STR, 275 pp, 2012.

675 Numaguti, A.: Origin and recycling processes of precipitating water over the Eurasian continent: Experiments using an  
676 atmospheric general circulation model, *J. Geophys. Res.*, 104(D2), 1957–1972, doi:10.1029/1998JD200026, 1999.

677 Park, S. and Bretherton, C. S.: The University of Washington shallow convection and moist turbulence schemes and their  
678 impact on climate simulations with the Community Atmosphere Model, *J. Climate*, 22(12), 3449–3469,  
679 doi:http://dx.doi.org/10.1175/2008JCLI2557.1, 2009.

680 Park, S., Bretherton, C. S., and Rasch, P. J.: Integrating cloud processes in the Community Atmosphere Model, version 5, *J.*  
681 *Climate*, 27(18), 6821–6856, doi:http://dx.doi.org/10.1175/JCLI-D-14-00087.1, 2014.

682 Qian, J. H., Tao, W. K., and Lau, K. M.: Mechanisms for Torrential Rain Associated with the Mei-Yu Development during  
683 SCSMEX 1998, *Mon. Wea. Rev.*, 132(1), 3–27, doi:http://dx.doi.org/10.1175/1520-  
684 0493(2004)132<0003:MFTRAW>2.0.CO;2, 2004.

685 Rasch, P. J., Coleman, D. B., Mahowald, N., and Williamson, D. L.: Characteristics of Atmospheric Transport Using Three  
686 Numerical Formulations for Atmospheric Dynamics in a Single GCM Framework, *J. Climate*, 19(11), 2243–2266,  
687 doi:http://dx.doi.org/10.1175/JCLI3763.1, 2006.

688 Rasch, P. J., Mahowald, N. M., and Eaton, B. E.: Representations of transport, convection, and the hydrologic cycle in  
689 chemical transport models: Implications for the modeling of short-lived and soluble species, *J. Geophys. Res.*, 102,  
690 28127–28138, doi:10.1029/97JD02087, 1997.

691 Raymond, D. J. and Blyth, A. M.: A stochastic mixing model for nonprecipitating cumulus clouds, *J. Atmos. Sci.*, 43(22),  
692 2708–2718, doi:http://dx.doi.org/10.1175/1520-0469(1986)043<2708:ASMMFN>2.0.CO;2, 1986.

693 Raymond, D. J. and Blyth, A. M.: Extension of the stochastic mixing model to cumulonimbus clouds, *J. Atmos. Sci.*, 49(21),  
694 1968–1983, doi:http://dx.doi.org/10.1175/1520-0469(1992)049<1968:EOTSMM>2.0.CO;2, 1992.

695 Reisner, J., Rasmussen, R. M., and Bruintjes, R. T.: Explicit forecasting of supercooled liquid water in winter storms using  
696 the MM5 mesoscale model, *Quart. J. Roy. Meteor. Soc.*, 124(548), 1071–1107, doi:10.1002/qj.49712454804, 1998.

697 Richter, J. H. and Rasch, P. J.: Effects of convective momentum transport on the atmospheric circulation in the community  
698 atmosphere model, version 3, *J. Climate*, 21(7), 1487–1499, doi:http://dx.doi.org/10.1175/2007JCLI1789.1, 2008.



699 Rienecker, M. M., Suarez, M. J., Gelaro, R., Todling, R., Bacmeister, J., Liu, E., Bosilovich, M. G., Schubert, S. D., Takacs,  
 700 L., Kim, G.-K., Bloom, S., Chen, J., Collins, D., Conaty, A., da Silva, A., Gu, W., Joiner, J., Koster, R. D., Lucchesi, R.,  
 701 Molod, A., Owens, T., Pawson, S., Pegion, P., Redder, C. R., Reichle, R., Robertson, F. R., Ruddick, A. G.,  
 702 Sienkiewicz, M., and Woollen, J.: MERRA: NASA's Modern-Era Retrospective analysis for Research and Applications,  
 703 J. Climate, 24(14), 3624–3648, doi:http://dx.doi.org/10.1175/JCLI-D-11-00015.1, 2011.

704 Savenije, H. H. G.: New definitions for moisture recycling and the relationship with land-use changes in the Sahel, J. Hydrol.,  
 705 167, 57–78, doi:10.1016/0022-1694(94)02632-L, 1995.

706 Simmonds, I., Bi, D. and Hope, P.: Atmospheric Water Vapor Flux and Its Association with Rainfall over China in Summer,  
 707 J. Climate, 12(5), 1353–1367, doi:http://dx.doi.org/10.1175/1520-0442(1999)012<1353:AWVFAI>2.0.CO;2, 1999.

708 Sodemann, H. and Zubler, E.: Seasonal and interannual variability of the moisture sources for Alpine precipitation during  
 709 1995–2002, Int. J. Climatol., 30, 947–961, doi:10.1002/joc.1932, 2010.

710 Sodemann, H., Schwierz, C., and Wernli, H.: Interannual variability of Greenland winter precipitation sources: Lagrangian  
 711 moisture diagnostic and North Atlantic Oscillation influence, J. Geophys. Res., 113, D03107,  
 712 doi:10.1029/2007JD008503, 2008.

713 Sodemann, H., Wernli, H. and Schwierz, C.: Sources of water vapour contributing to the Elbe flood in August 2002—A  
 714 tagging study in a mesoscale model, Q.J.R. Meteorol. Soc., 135, 205–223, doi:10.1002/qj.374, 2009.

715 Stohl, A. and James, P.: A Lagrangian analysis of the atmospheric branch of the global water cycle. Part I: Method  
 716 description, validation, and demonstration for the August 2002 flooding in central Europe, J. Hydrometeorol., 5(4),  
 717 656–678, doi:http://dx.doi.org/10.1175/1525-7541(2004)005<0656:ALAOTA>2.0.CO;2, 2004.

718 Stohl, A., Forster, C., and Sodemann, H.: Remote sources of water vapor forming precipitation on the Norwegian west coast  
 719 at 60 °N – a tale of hurricanes and an atmospheric river, J. Geophys. Res., 113, D05102, doi:10.1029/2007JD009006,  
 720 2008.

721 Sundqvist, H.: Parameterization of condensation and associated clouds in models for weather prediction and general  
 722 circulation simulation, Physically-based modelling and simulation of climate and climatic change, Springer Netherlands,  
 723 pp 433–461, 1998.

724 [Thompson, G., Rasmussen, R. M., and Manning, K.: Explicit forecasts of winter precipitation using an improved bulk](#)  
725 [microphysics scheme. Part I: Description and sensitivity analysis, Mon. Wea. Rev., 132\(2\), 519–542,](#)  
726 [doi:http://dx.doi.org/10.1175/1520-0493\(2004\)132<0519:EFOWPU>2.0.CO;2, 2004](#)

727 Trenberth, K. E.: Atmospheric moisture recycling: Role of advection and local evaporation, J. Clim., 12(5), 1368–1381,  
728 doi:http://dx.doi.org/10.1175/1520-0442(1999)012<1368:AMRROA>2.0.CO;2, 1999.

729 Wei, J., Dirmeyer, P. A., Bosilovich, M. G., and Wu, R.: Water vapor sources for Yangtze River Valley rainfall:  
730 Climatology, variability, and implications for rainfall forecasting, J. Geophys. Res. Atmos., 117, D05126,  
731 doi:10.1029/2011JD016902, 2012.

732 Xu, X. D., Shi, X. Y., Wang, Y. Q., Peng, S. Q., and Shi, X. H.: Data analysis and numerical simulation of moisture source  
733 and transport associated with summer precipitation in the Yangtze River Valley over China, Meteorol. Atmos. Phys.,  
734 100(1), 217–231, doi:10.1007/s00703-008-0305-8, 2008.

735 Zhang, G. J. and McFarlane, N. A.: Sensitivity of climate simulations to the parameterization of cumulus convection in the  
736 Canadian Climate Centre general circulation model, Atmos. Ocean, 33(3), 407–446,  
737 doi:10.1080/07055900.1995.9649539, 1995.

738 [Zhang, M., Lin, W., Bretherton, C., Hack, J., and Rasch, P. J.: A modified formulation of fractional stratiform condensation](#)  
739 [rate in the NCAR Community Atmospheric Model \(CAM2\), J. Geophys. Res., 108\(D1\), 4035,](#)  
740 [doi:10.1029/2002JD002523, 2003.](#)

741

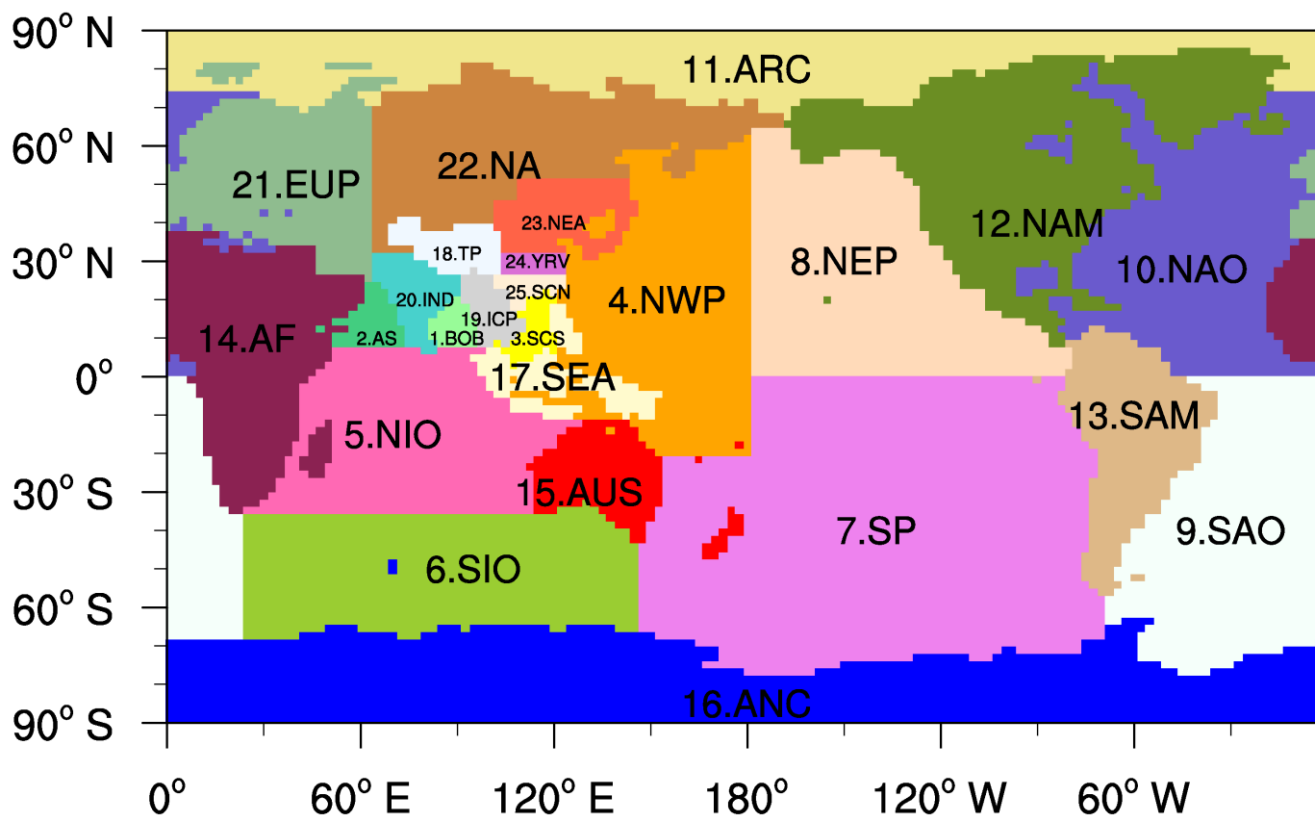

742

743 **Figure 1.** Moisture source regions: the regions are denoted as (1) Bay of Bengal: BOB; (2) Arabian Sea: AS; (3) South China Sea: SCS; (4)  
744 Northwest Pacific: NWP; (5) north Indian Ocean: NIO; (6) southern Indian Ocean: SIO; (7) southern Pacific: SP; (8) Northeast Pacific:  
745 NEP; (9) southern Atlantic Ocean: SAO; (10) northern Atlantic Ocean: NAO; (11) Arctic Ocean: ARC; (12) North America: NAM; (13)  
746 South America: SAM; (14) Africa: AF; (15) Australia: AUS; (16) Antarctic: ANC; (17) Southeast Asia: SEA; (18) Tibet Plateau: TP; (19)  
747 Indo-China Peninsula: ICP; (20) India: IND; (21) Europe: EUP; (22) North Asia: NA; (23) Northeast Asia: NEA; (24) Yangtze River  
748 Valley: YRV; (25) South China: SCN.

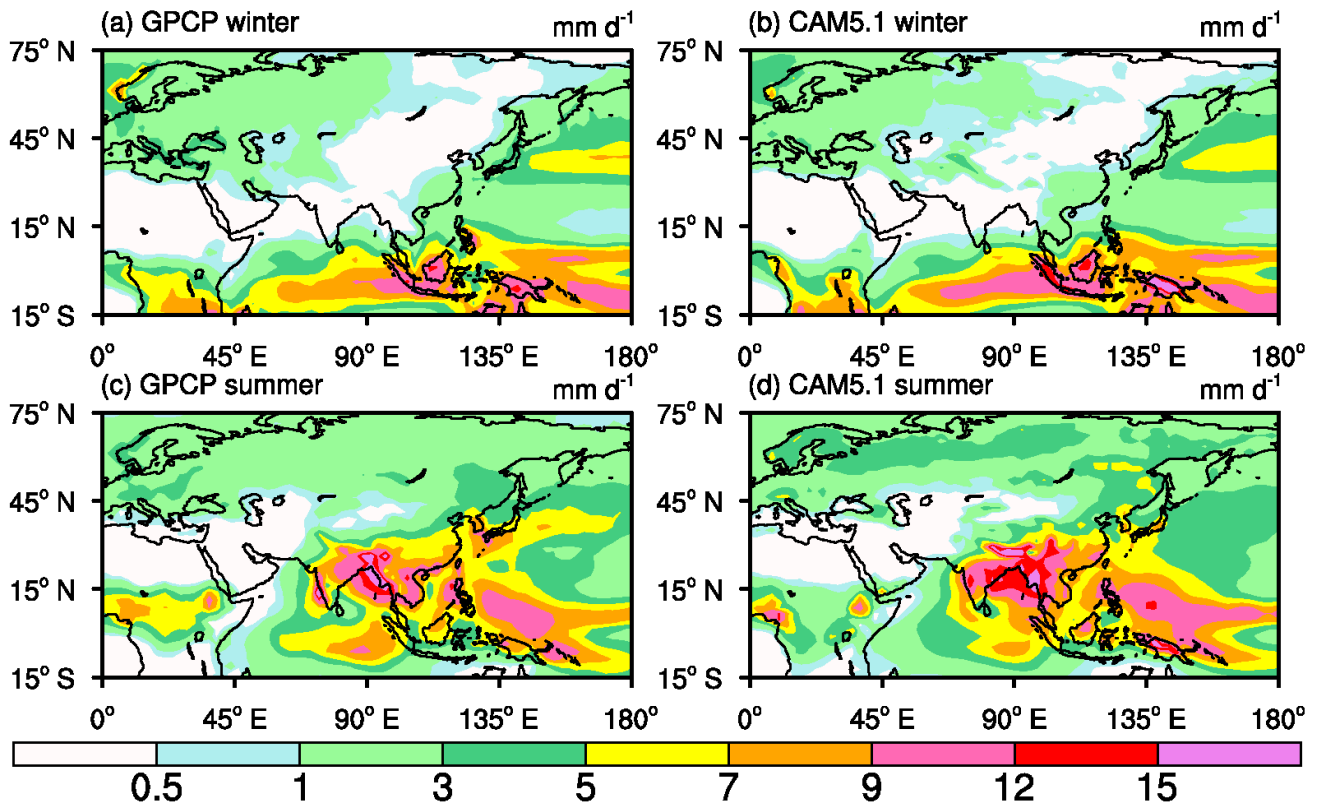

749

750 **Figure 2.** Comparisons between (left) GPCP data and (right) CAM5.1 precipitation simulations during (top) winter and (bottom) summer  
 751 (ten-year averages for 1998 to 2007).

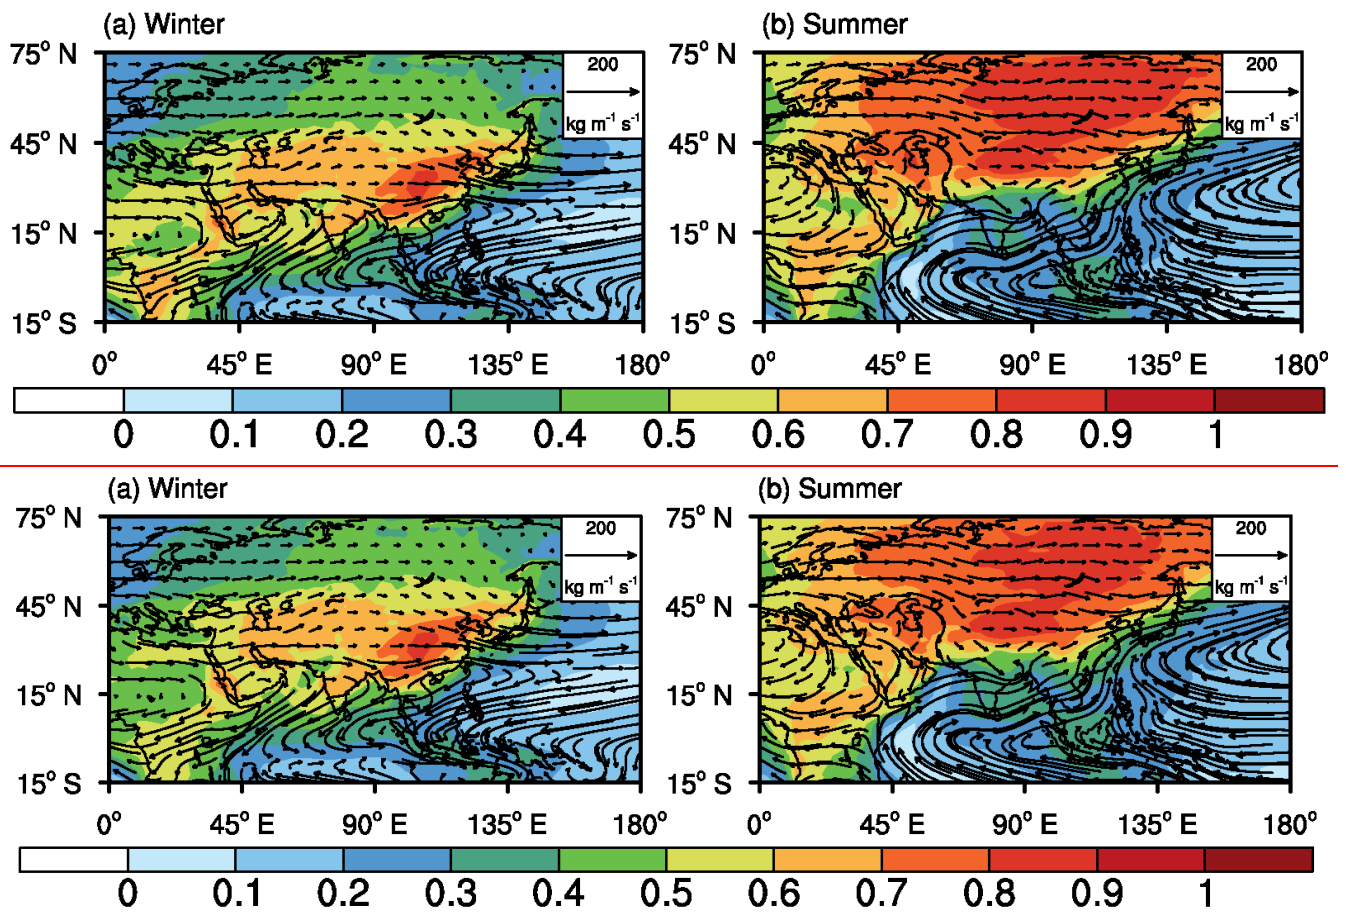

**Figure 3.** Distribution of the relative contribution to precipitation from all land source regions defined in **Fig. 1** (colours, unit:  $\frac{\text{ratio of tagged precipitation over total precipitation}}{\text{the vertically integrated total tropospheric water vapour flux}}$ ) and the vertically integrated total tropospheric water vapour flux (arrow streamlines, unit:  $\text{kg m}^{-1} \text{s}^{-1}$ ) during (a) winter and (b) summer.

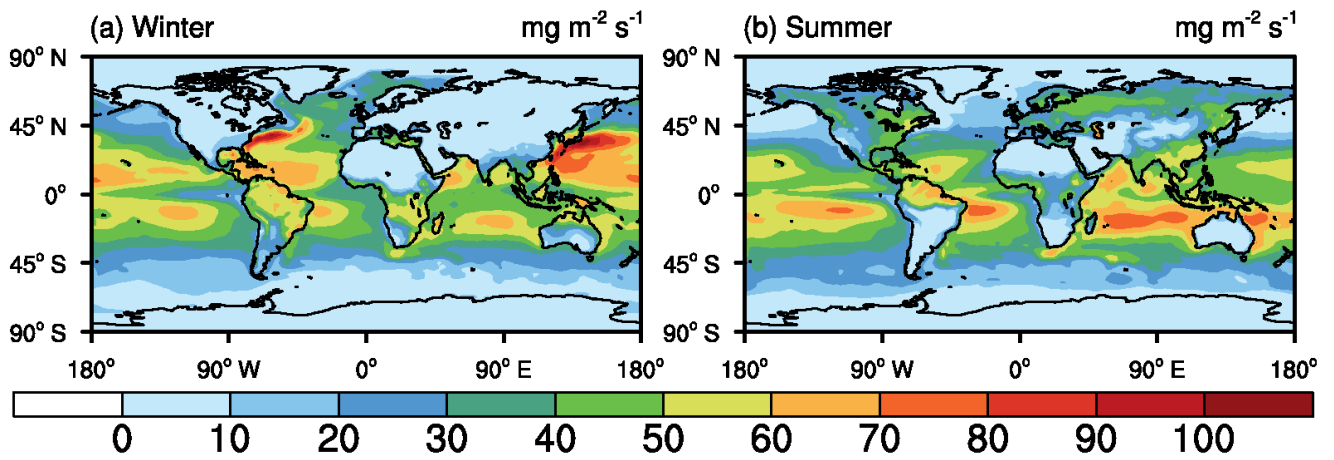

757

758 **Figure 4.** Distribution of CAM5.1's ten-year averaged surface evaporation flux (unit:  $\text{mg m}^{-2} \text{s}^{-1}$ ) in (a) winter and (b) summer between  
 759 1998 and 2007.

760

761

762

763

764

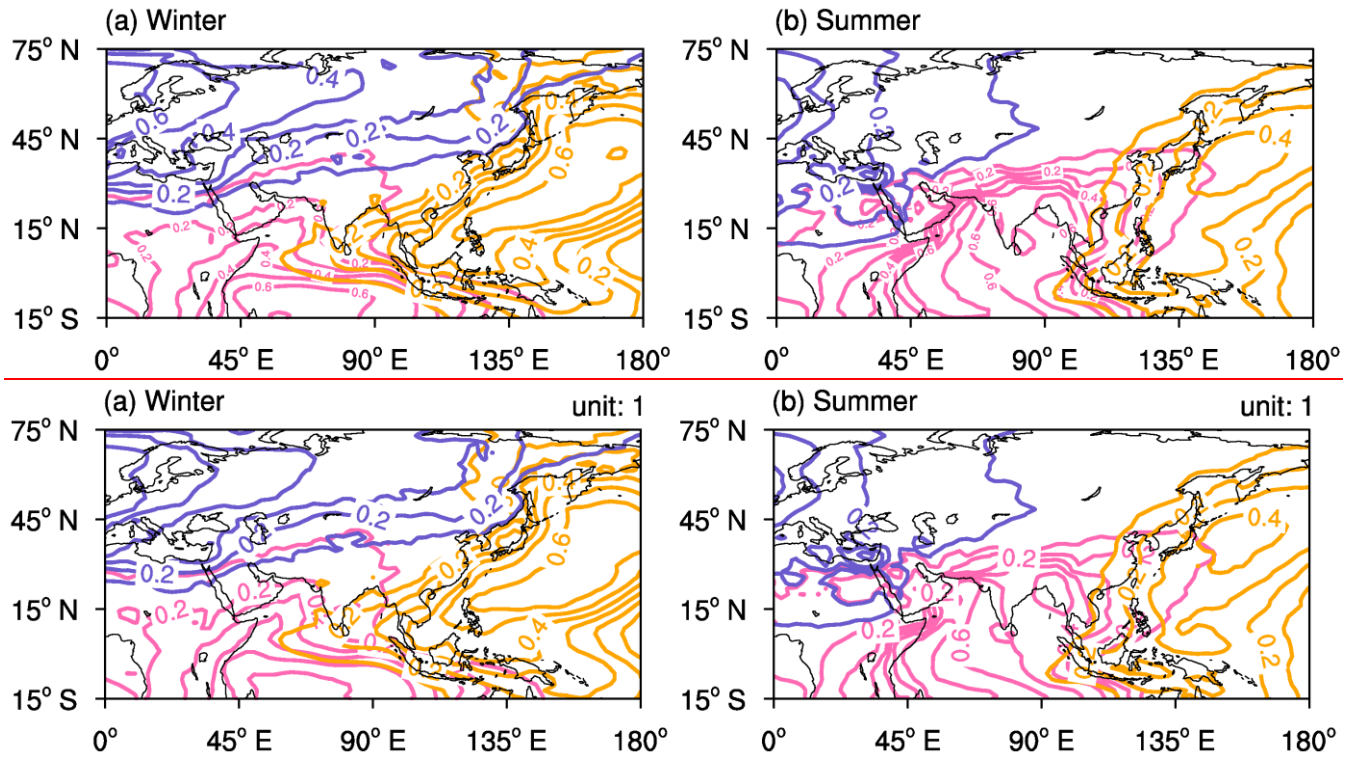

**Figure 5.** Distributions of the ratios of precipitation (unit: ratio of tagged precipitation over total precipitation) supplied from the NAO (slate blue), the extended north Indian Ocean (NIO + BOB + AS, pink), and the extended Northwest Pacific (NWP + SCS, orange) during (a) winter and (b) summer. Contour interval is 0.1.

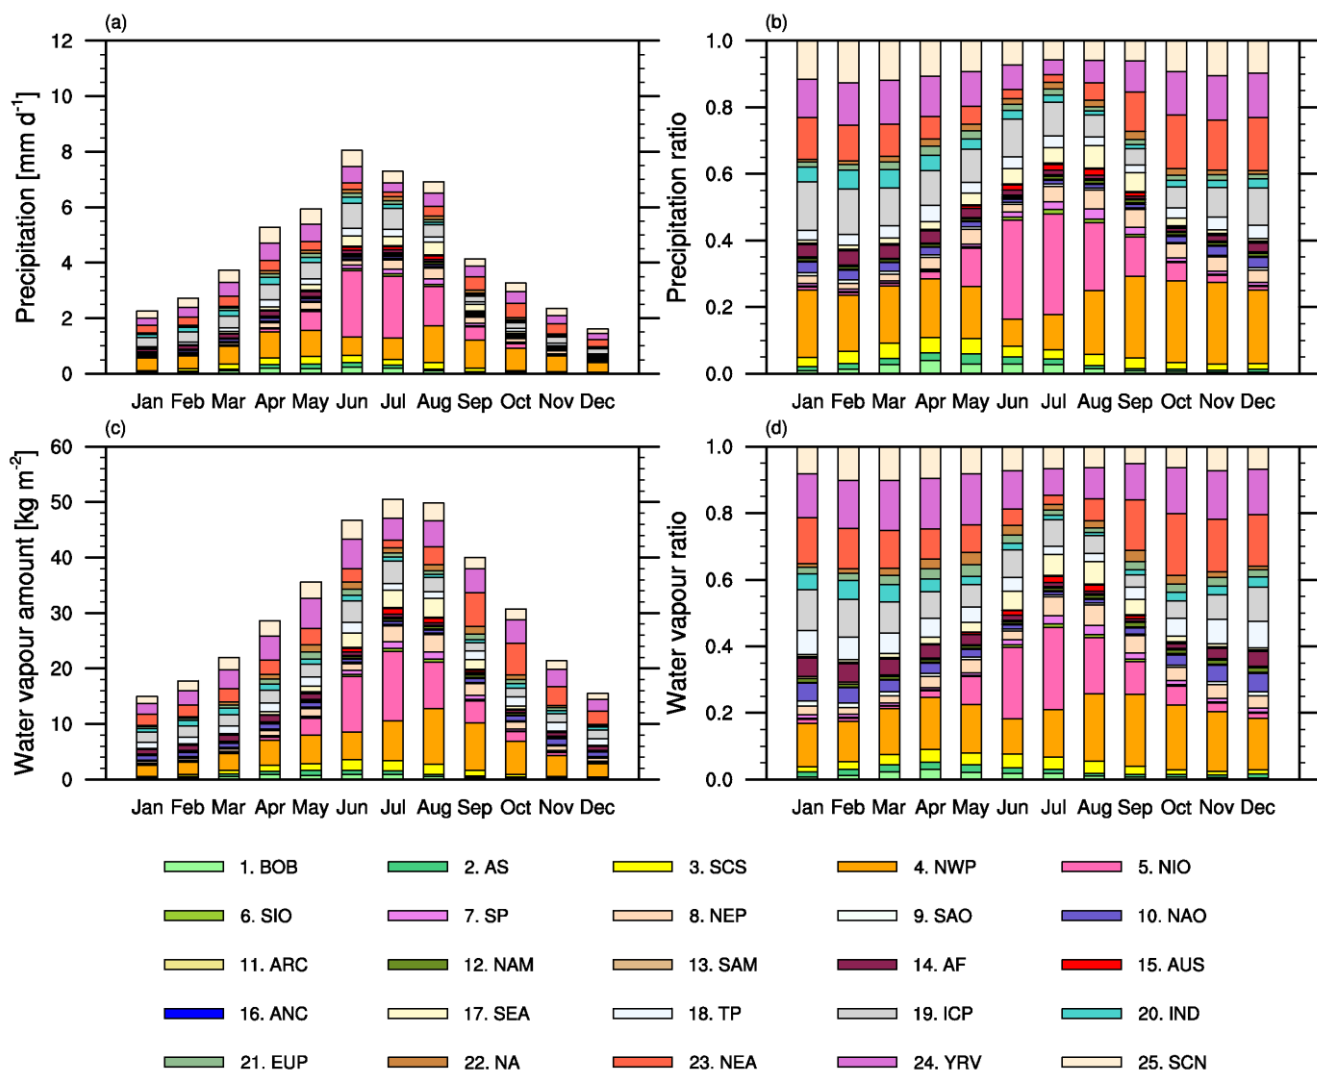



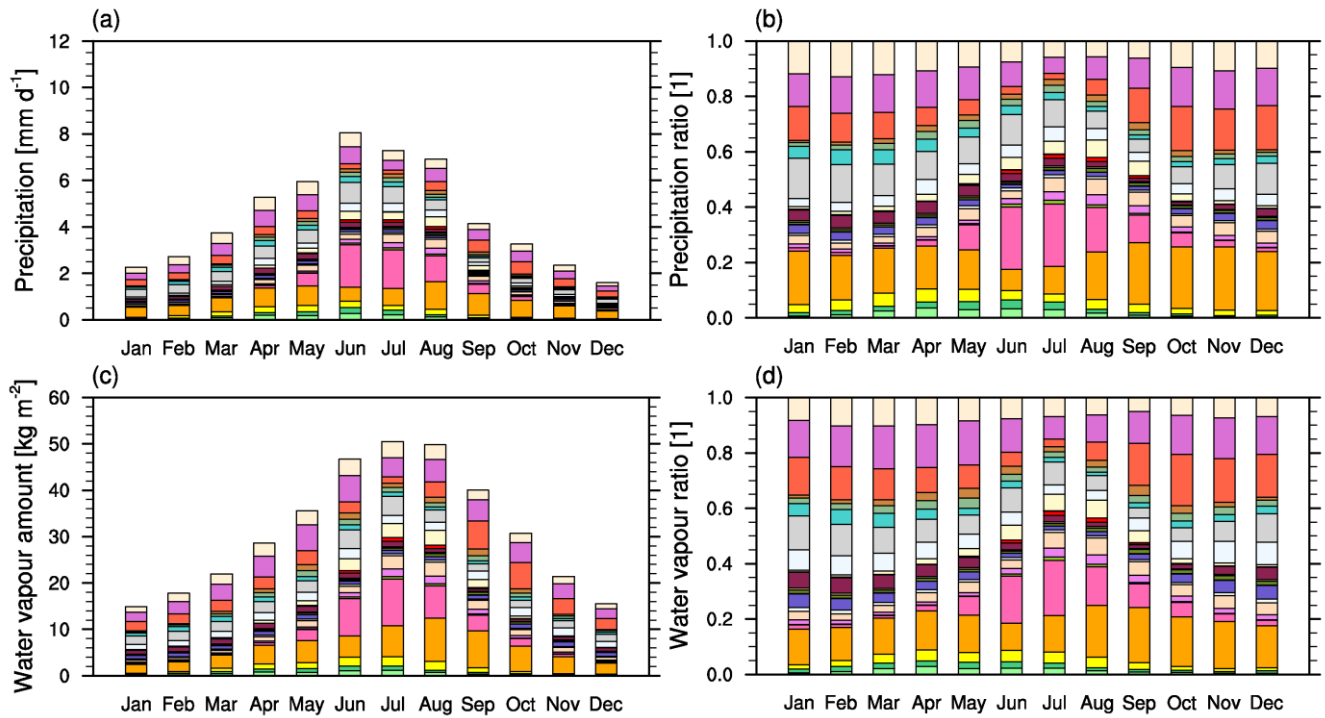

**Figure 6.** (a) Monthly averaged evaporative contributions of 25 defined source regions to the precipitation over the YRV. (b) Same as Fig. 6a, but for the relative contribution to precipitation. (c) Monthly averaged evaporative contributions of 25 defined source regions to the tropospheric total water vapour amount over the YRV. (d) Same as Fig. 6c, but for the relative contribution to water vapour. Stacked column colours correspond to source region colours in Fig. 1.

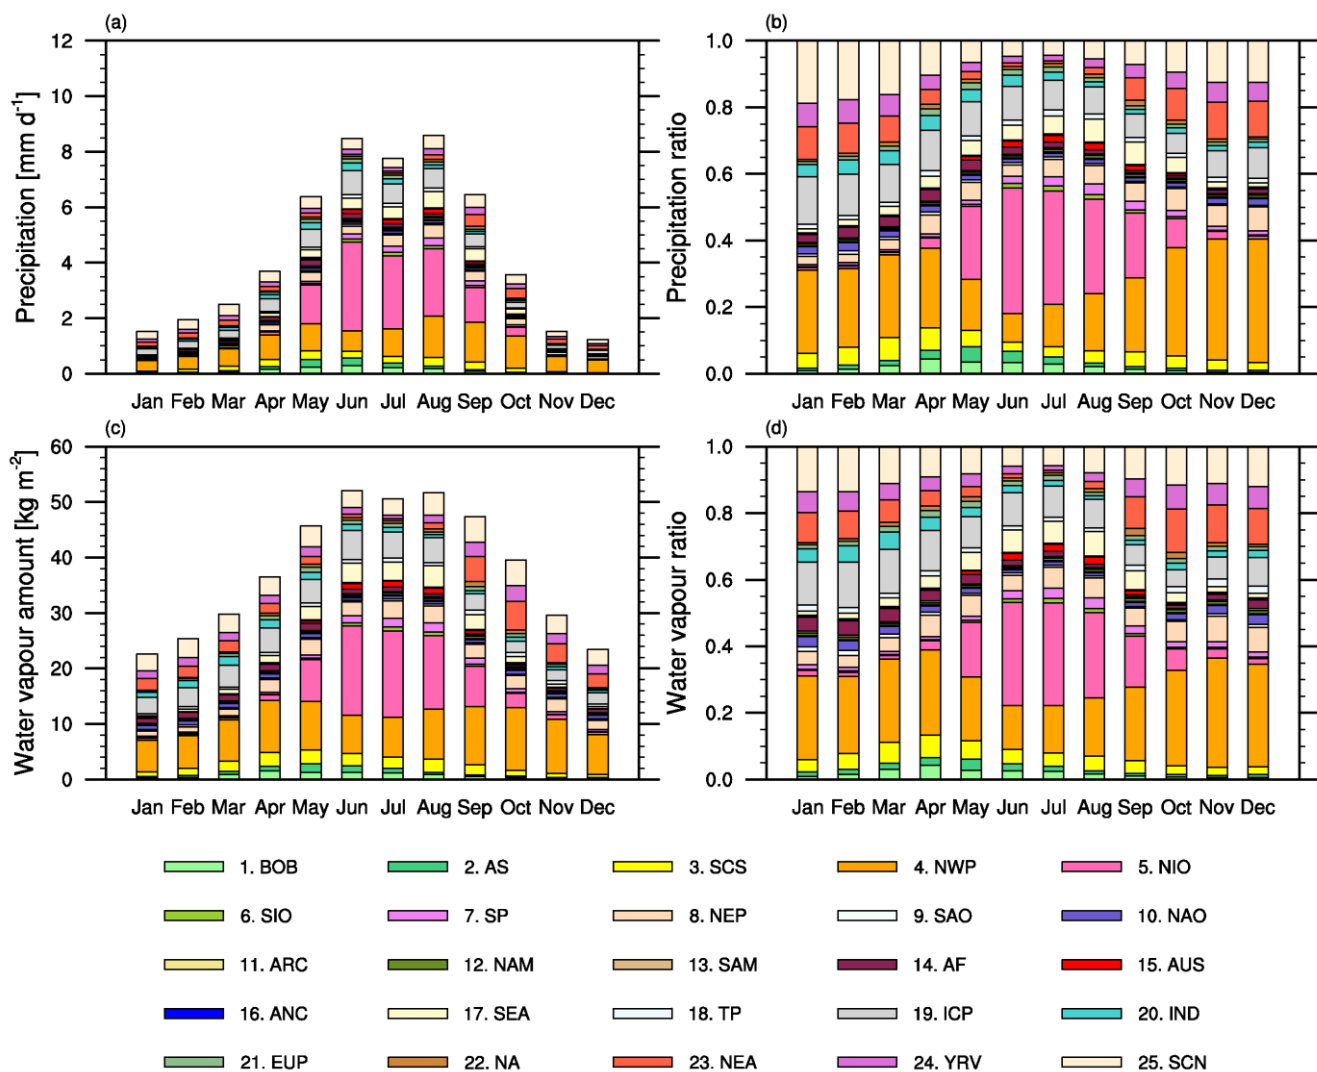

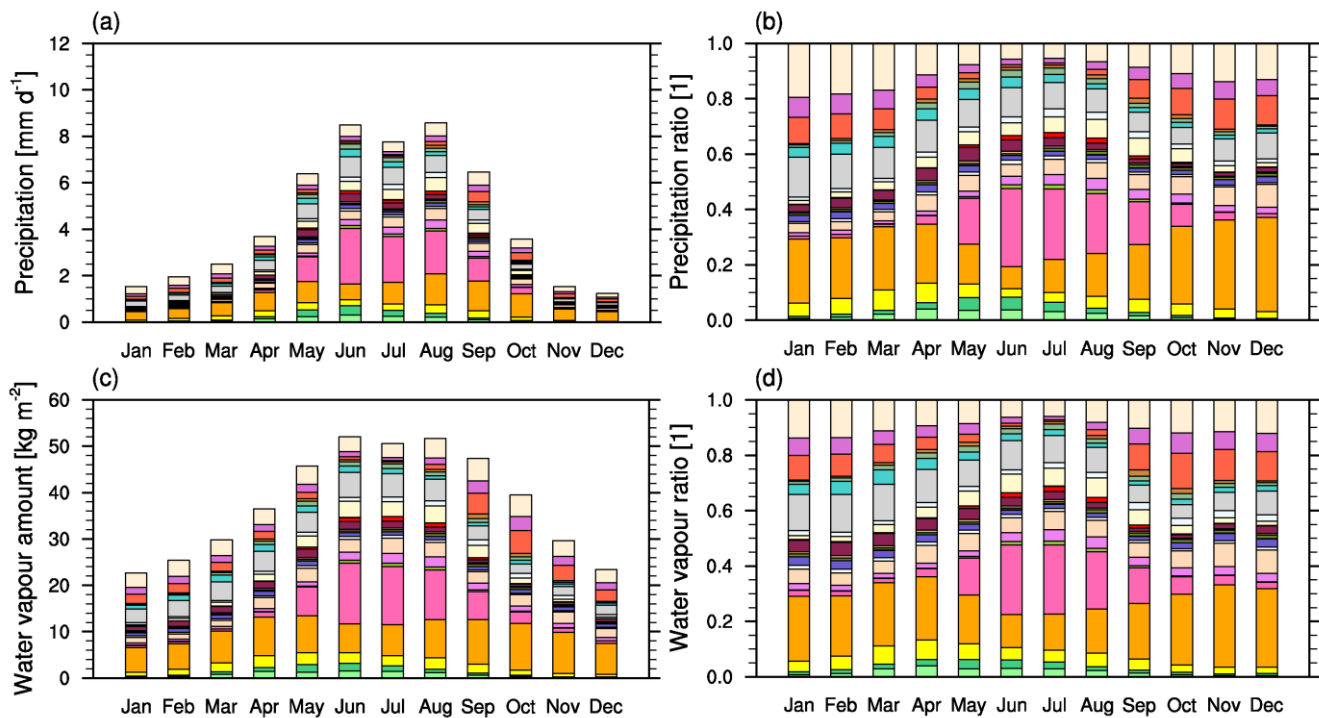

**Figure 7.** Same as **Fig. 6**, but for the contributions and relative contributions of 25 source regions to precipitation and tropospheric total water vapour amount over SCN.

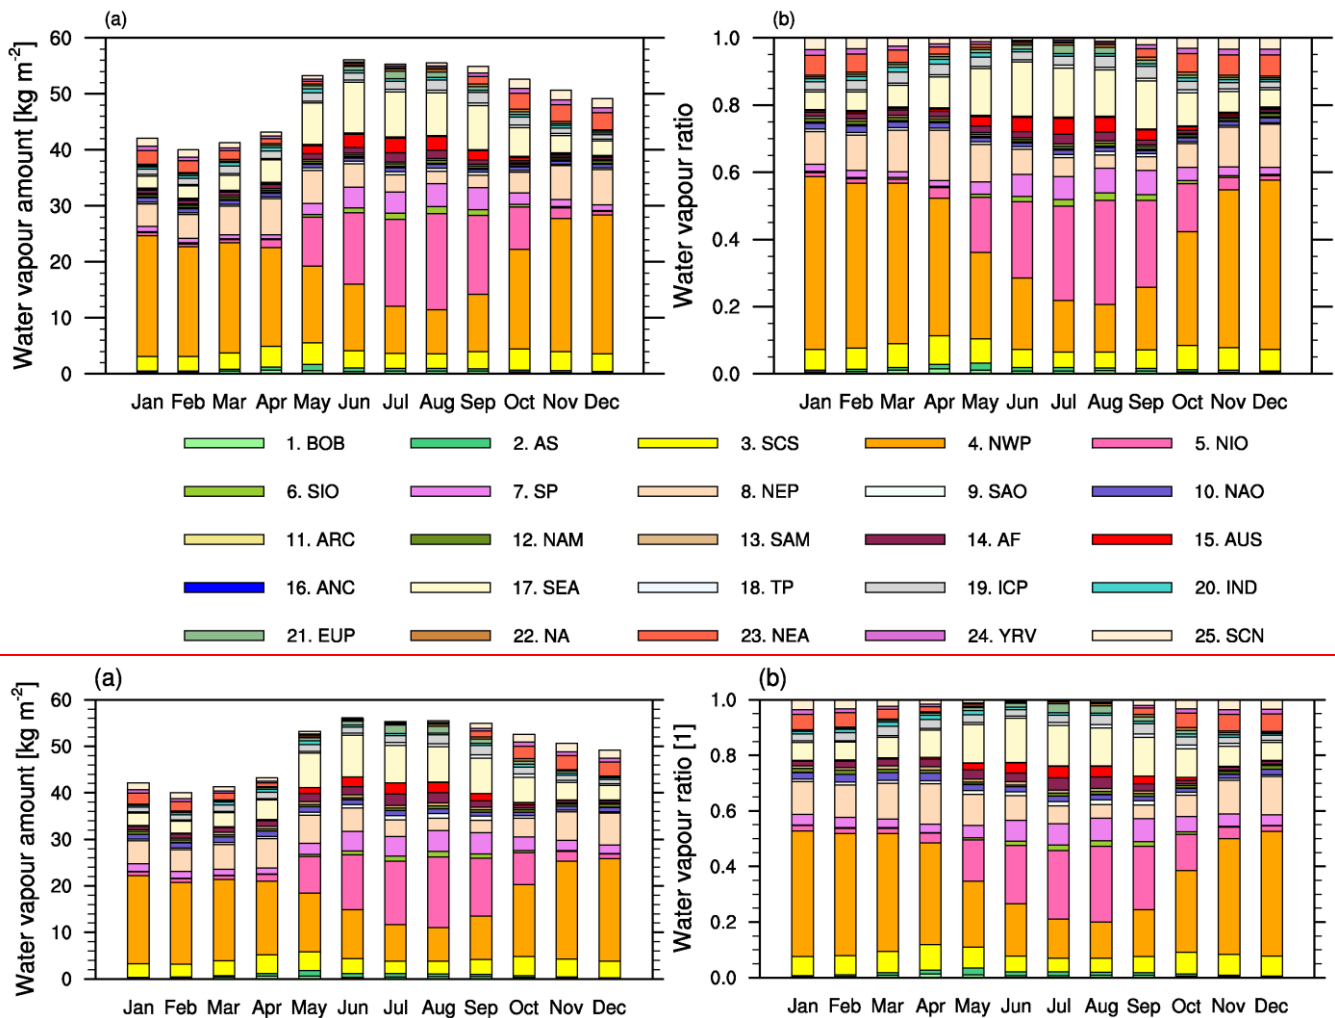

**Figure 8.** (a) Monthly averaged evolution of evaporative contribution of 25 defined source regions to the tropospheric total water vapour amount over the SCS. (b) Same as **Fig. 8a**, but for the relative contribution of water vapour. Stacked column colours correspond to source region colours in **Fig. 1**.
